# Supplementary material for: Development and evaluation of a patient-centred program for low anterior resection syndrome: protocol for a randomized controlled trial
Source: PubMed Central journal article supplement — BMJ Open. 2020 May 30;10(5):e035587. doi: 10.1136/bmjopen-2019-035587 (PMC7264642; doi:10.1136/bmjopen-2019-035587), 2020-05-30
Supplement: bmjopen-2019-035587.draft_revisions.pdf [file bmjopen-2019-035587.draft_revisions.pdf]

# BMJ Open

BMJ Open is committed to open peer review. As part of this commitment we make the peer review history of every article we publish publicly available.

When an article is published we post the peer reviewers' comments and the authors' responses online. We also post the versions of the paper that were used during peer review. These are the versions that the peer review comments apply to.

The versions of the paper that follow are the versions that were submitted during the peer review process. They are not the versions of record or the final published versions. They should not be cited or distributed as the published version of this manuscript.

BMJ Open is an open access journal and the full, final, typeset and author-corrected version of record of the manuscript is available on our site with no access controls, subscription charges or pay-per-view fees (<http://bmjopen.bmj.com>).

If you have any questions on BMJ Open's open peer review process please email [info.bmjopen@bmj.com](mailto:info.bmjopen@bmj.com)

# BMJ Open

## Development and Evaluation of a Patient-Centered Program for Low Anterior Resection Syndrome: Protocol for a Randomized Controlled Trial

|                               |                                                                                                                                                                                                                                                                                                                                                                                                                                                                                                                                                                                                                                                                                                                                                                                                                                                                                                                                                                                             |
|-------------------------------|---------------------------------------------------------------------------------------------------------------------------------------------------------------------------------------------------------------------------------------------------------------------------------------------------------------------------------------------------------------------------------------------------------------------------------------------------------------------------------------------------------------------------------------------------------------------------------------------------------------------------------------------------------------------------------------------------------------------------------------------------------------------------------------------------------------------------------------------------------------------------------------------------------------------------------------------------------------------------------------------|
| Journal:                      | <i>BMJ Open</i>                                                                                                                                                                                                                                                                                                                                                                                                                                                                                                                                                                                                                                                                                                                                                                                                                                                                                                                                                                             |
| Manuscript ID                 | bmjopen-2019-035587                                                                                                                                                                                                                                                                                                                                                                                                                                                                                                                                                                                                                                                                                                                                                                                                                                                                                                                                                                         |
| Article Type:                 | Protocol                                                                                                                                                                                                                                                                                                                                                                                                                                                                                                                                                                                                                                                                                                                                                                                                                                                                                                                                                                                    |
| Date Submitted by the Author: | 06-Nov-2019                                                                                                                                                                                                                                                                                                                                                                                                                                                                                                                                                                                                                                                                                                                                                                                                                                                                                                                                                                                 |
| Complete List of Authors:     | Garfinkle, Richard; Jewish General Hospital, Division of Colon and Rectal Surgery<br>Loiselle, Carmen; McGill University, Department of Oncology<br>Park, Jason; University of Manitoba, Department of Surgery<br>Fiore Jr, Julio; McGill University, Department of Surgery<br>Bordeianou, Liliana; Massachusetts General Hospital, Section of Colon and Rectal Surgery<br>Lieberman, A.; McGill University Health Centre, Department of Surgery<br>Morin, Nancy; Jewish General Hospital, Division of Colon and Rectal Surgery<br>Faria, Julio; Jewish General Hospital, Division of Colon and Rectal Surgery<br>Ghitulescu, Gabriela; Jewish General Hospital, Division of Colon and Rectal Surgery<br>Vasilevsky, Carol-Ann; Jewish General Hospital, Division of Colon and Rectal Surgery<br>Bhatnagar, Sahir; McGill University, Department of Epidemiology, Biostatistics and Occupational Health<br>Boutros, Marylise; Jewish General Hospital, Division of Colon and Rectal Surgery |
| Keywords:                     | Colorectal surgery < SURGERY, Gastrointestinal tumours < ONCOLOGY, Epidemiology < ONCOLOGY, Adult gastroenterology < GASTROENTEROLOGY                                                                                                                                                                                                                                                                                                                                                                                                                                                                                                                                                                                                                                                                                                                                                                                                                                                       |
|                               |                                                                                                                                                                                                                                                                                                                                                                                                                                                                                                                                                                                                                                                                                                                                                                                                                                                                                                                                                                                             |

SCHOLARONE™  
Manuscripts

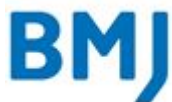

I, the Submitting Author has the right to grant and does grant on behalf of all authors of the Work (as defined in the below author licence), an exclusive licence and/or a non-exclusive licence for contributions from authors who are: i) UK Crown employees; ii) where BMJ has agreed a CC-BY licence shall apply, and/or iii) in accordance with the terms applicable for US Federal Government officers or employees acting as part of their official duties; on a worldwide, perpetual, irrevocable, royalty-free basis to BMJ Publishing Group Ltd ("BMJ") its licensees and where the relevant Journal is co-owned by BMJ to the co-owners of the Journal, to publish the Work in this journal and any other BMJ products and to exploit all rights, as set out in our [licence](#).

The Submitting Author accepts and understands that any supply made under these terms is made by BMJ to the Submitting Author unless you are acting as an employee on behalf of your employer or a postgraduate student of an affiliated institution which is paying any applicable article publishing charge ("APC") for Open Access articles. Where the Submitting Author wishes to make the Work available on an Open Access basis (and intends to pay the relevant APC), the terms of reuse of such Open Access shall be governed by a Creative Commons licence – details of these licences and which [Creative Commons](#) licence will apply to this Work are set out in our licence referred to above.

Other than as permitted in any relevant BMJ Author's Self Archiving Policies, I confirm this Work has not been accepted for publication elsewhere, is not being considered for publication elsewhere and does not duplicate material already published. I confirm all authors consent to publication of this Work and authorise the granting of this licence.

## Development and Evaluation of a Patient-Centered Program for Low Anterior Resection Syndrome: Protocol for a Randomized Controlled Trial

Richard Garfinkle, MD<sup>1</sup>; Carmen G. Loiselle, PhD<sup>2</sup>; Jason Park, MD<sup>3</sup>; Julio Fiore Jr, PhD<sup>4</sup>; Liliana G. Bordeianou, MD<sup>5</sup>; A. Sender Liberman, MD<sup>4</sup>; Nancy Morin, MD<sup>1</sup>; Julio Faria, MD<sup>1</sup>; Gabriela Ghitulescu, MD<sup>1</sup>; Carol-Ann Vasilevsky, MD<sup>1</sup>; Sahir R. Bhatnagar<sup>6</sup>, PhD; Marylise Boutros, MD<sup>1</sup>

1. Division of Colon and Rectal Surgery, Jewish General Hospital, Montreal, QC, Canada
2. Department of Oncology and Ingram School of Nursing, McGill University, Montreal, QC, Canada
3. Department of Surgery, University of Manitoba, Winnipeg, MB, Canada
4. Department of Surgery, McGill University, Montreal, QC, Canada
5. Section of Colon and Rectal Surgery, Massachusetts General Hospital, Boston, MA, USA
6. Department of Epidemiology, Biostatistics and Occupational Health, McGill University, Montreal, QC, Canada

### Correspondence:

Marylise Boutros, MDCM, FRCSC  
Associate Professor of Surgery, McGill University  
Jewish General Hospital  
3755 Cote Ste Catherine, G-317  
Montreal, Quebec  
H3T 1E2  
(Tel) 514-340-8222 x 28400  
(Fax) 514-340-7560  
Email: [maryliseboutros@gmail.com](mailto:maryliseboutros@gmail.com)

## ABSTRACT

**Introduction:** Low Anterior Resection Syndrome (LARS) affects the majority of individuals following restorative proctectomy for rectal cancer. The management of LARS includes personalized troubleshooting and effective self-management behaviors. Thus, affected individuals need to be well informed and appropriately engaged in their own LARS management. This manuscript describes the development of a LARS Patient-Centered Program (LPCP) and the study protocol for its evaluation in a randomized controlled trial.

**Methods and Analysis:** This will be a multicenter, randomized, assessor-blind, parallel-groups, pragmatic trial evaluating the impact of a LPCP, consisting of an informational booklet, patient diaries, and nurse support, on patient-reported outcomes after restorative proctectomy for rectal cancer. The informational booklet was developed by a multidisciplinary LARS team, and was vetted in focus groups and semi-structured interviews involving patients, caregivers, and healthcare professionals. The primary outcome will be global quality of life (QoL), as measured by the European Organization for Research and Treatment of Cancer Quality of Life Questionnaire – Core 30 (QLQ-C30), at 6 months after surgery. The treatment effect on global QOL will be modeled using generalized estimating equations. Secondary outcomes include patient activation, bowel function measures, emotional distress, knowledge about LARS, and satisfaction with the LPCP.

**Ethics and Dissemination:** The Research Ethics Committee at the Integrated Health and Social Services Network (CIUSSS) for West-Central Montreal (health network responsible for the Jewish General Hospital) has approved the study protocol in its current format (MP-05-2019-1628). Collaborating sites are currently submitting the protocol for approval with their local ethics committees, and will not begin patient recruitment until full approval is obtained. The

1  
2  
3 results of this study will be presented at national and international conferences, and a manuscript  
4  
5 with results will be submitted for publication in a high-impact peer-reviewed journal.  
6

7  
8 **Registration:** This trial was registered on clinicaltrials.gov on February 4, 2019 (no:  
9  
10 NCT03828318).  
11  
12  
13  
14  
15  
16  
17  
18  
19  
20  
21  
22  
23  
24  
25  
26  
27  
28  
29  
30  
31  
32  
33  
34  
35  
36  
37  
38  
39  
40  
41  
42  
43  
44  
45  
46  
47  
48  
49  
50  
51  
52  
53  
54  
55  
56  
57  
58  
59  
60

For peer review only

### Strengths and Limitations of the Study

- This will be the first randomized controlled trial evaluating a supportive intervention for patients with Low Anterior Resection Syndrome
- This study will collect longitudinal data on patient-reported outcomes following restorative proctectomy, and will report on the natural evolution of several important outcome measures over the first postoperative year
- The informational booklet used in the trial underwent a rigorous pre-trial assessment and was revised into its final format based on feedback obtained in focus groups involving patients, caregivers, and healthcare professionals
- As with any longitudinal study, there is a risk for attrition throughout the study period, which could be a source of bias in the final results
- Management in the standard care group will vary by institution; however, none of the participating institutions have a formal LARS program for rectal cancer survivors

## INTRODUCTION

Restorative proctectomy is increasingly performed for rectal cancer as surgeons continue to push the limits of sphincter preservation.<sup>1,2</sup> However, despite avoiding a permanent ostomy, many individuals are left with significant bowel dysfunction after sphincter-sparing surgery. Low Anterior Resection Syndrome (LARS) encompasses a series of negative bowel symptoms, such as frequency, urgency, incontinence, and clustering of bowel movements,<sup>3</sup> that can affect 70 to 90% of patients following restorative proctectomy.<sup>4,5</sup> Although symptoms may improve somewhat in the first year or two after surgery, long-term bowel dysfunction often remains in more than 70% of patients and major dysfunction in over 50%.<sup>6-8</sup> As such, LARS remains a significant concern for rectal cancer survivors and their significant others, as increased severity correlates with worse perceived global health status and quality of life (QoL).<sup>5,8,9</sup>

Currently, there is no well-established treatment strategy for LARS, and management is both empirical and symptom-based.<sup>4</sup> LARS is usually managed with a combination of lifestyle, pharmacological, and at times, interventional strategies, with mixed success. Due to the individual nature of each patient's cluster of symptoms, much of the care requires personalized troubleshooting and self-management behaviors to improve bowel symptoms and QoL.<sup>4</sup> These behaviors include understanding one's own symptoms, knowing how to use and dose stool bulking agents and anti-diarrheal medications, performing pelvic floor exercises, adhering to dietary recommendations, proper perianal skin management, and preparing ahead of social engagements. Thus, individuals need to be well informed, motivated and engaged in their own LARS management to take more control over their bowel function and achieve optimal outcomes.



1  
2  
3           Among individuals undergoing rectal resection with a permanent ostomy (e.g.,  
4  
5 abdominoperineal resection), there is evidence that supportive and informational interventions  
6  
7 improve QoL, ostomy proficiency, self-efficacy and knowledge.<sup>10-12</sup> However, evidence  
8  
9 regarding the impact of such interventions in patients who undergo restorative proctectomy is  
10  
11 lacking, despite the latter operation being far more frequently performed.<sup>1</sup> When provided with  
12  
13 the means to better understand and control important aspects of their bowel function, patients  
14  
15 may be more likely to experience positive improvements in self-reported outcomes. In a recent  
16  
17 review comparing long-term patient-reported outcomes after ostomy or sphincter-sparing surgery  
18  
19 for low rectal cancer, the authors concluded that interventions geared towards patients without  
20  
21 ostomies warrant further attention.<sup>13</sup>  
22  
23  
24  
25

26           This paper describes a study protocol for a randomized controlled trial (RCT)  
27  
28 investigating the impact of a LARS Patient-Centered Program (LPCP) on patient-reported  
29  
30 outcomes after restorative proctectomy for rectal cancer. Furthermore, qualitative data are  
31  
32 presented that were gathered through a focus group assembling individuals with LARS and their  
33  
34 caregivers, and through semi-structured interviews with rectal cancer healthcare professionals, as  
35  
36 a joint effort to develop the LPCP.  
37  
38  
39  
40  
41

## 42 **METHODS AND ANALYSIS**

### 43 **Phase 1: Study Protocol for Proposed RCT**

44  
45           The study protocol was written in accordance with the Standard Protocol Items:  
46  
47 Recommendations for Interventional Trials (SPIRIT) statement.<sup>14</sup>  
48  
49

#### 50 Objectives

1  
2  
3 The overall objective of this study is to evaluate the effects of a LCPC on patient-  
4 reported outcome measures (PROMs) after restorative proctectomy for rectal cancer.  
5  
6 Specifically, our primary objective is to evaluate the extent to which a LPCP improves global  
7  
8 QoL, as measured by the European Organization for Research and Treatment of Cancer  
9  
10 (EORTC) Quality of Life Questionnaire – Core 30 (QLQ-C30), at 6 months after surgery in  
11  
12 comparison to standard care. Secondary objectives include the effects of a LPCP on patient  
13  
14 activation, bowel function, emotional distress and patient knowledge.  
15  
16  
17  
18

### 19 Participants and Setting

20  
21 This multicenter RCT involves participants from multiple institutions across North  
22  
23 America with high-volume Colorectal Surgery or Surgical Oncology practices. Patients who  
24  
25 have undergone restorative proctectomy for neoplastic disease (benign or malignant) located in  
26  
27 the rectum (0-15cm from the anal verge) with a diverting ostomy and who are scheduled for  
28  
29 ostomy closure are eligible for inclusion. Patients will be recruited approximately one month  
30  
31 prior to ostomy closure by their individual surgeon, who will go through the informed consent  
32  
33 process with them. Exclusion criteria include: 1) active chemotherapy or radiotherapy treatment  
34  
35 at the time of consent; 2) major colonic resection in addition to proctectomy; 3) inability to be  
36  
37 contacted by telephone; 4) inability to read and comprehend English or French; and 5) inability  
38  
39 to provide clear and informed consent.  
40  
41  
42  
43

### 44 Randomization

45  
46 Consecutive participants will be randomized in a 1:1 ratio into one of two groups: 1)  
47  
48 LARS Patient-Centered Program; or 2) Standard Care. Block randomization with randomly  
49  
50 varying block sizes will be performed to ensure an equal number of participants in each group.  
51  
52  
53  
54  
55  
56  
57  
58  
59  
60

1  
2  
3 Randomization will also be stratified by participating institution. An online centralized  
4  
5 computer-generated randomization sequence will be used to ensure allocation concealment.  
6

### 7 LARS Patient-Centered Program

8  
9  
10 The LPCP consists of an informational booklet, patient diaries, and nursing support made  
11  
12 available only to patients randomized to the intervention group.  
13

#### 14 1. Informational Booklet and Patient Diaries:

15  
16  
17 The goals of the booklet are to inform individuals with rectal cancer about postoperative  
18  
19 bowel dysfunction, manage expectations, and review the different treatment strategies. Prior to  
20  
21 developing the booklet, our team conducted a systematic review of online health information for  
22  
23 LARS to assess the readability, suitability, quality, accuracy and content of materials currently  
24  
25 available to patients.<sup>15</sup> We concluded that the current body of health information for patients  
26  
27 with LARS is suboptimal. In particular, no patient material was written at the American Medical  
28  
29 Association-recommended 6<sup>th</sup> grade reading level, there was little use of headings, summaries  
30  
31 and illustrations to accompany the text, and important content was missing. We then set out to  
32  
33 develop our own informational booklet, drawing on the important elements emphasized in each  
34  
35 assessment tool used in the systematic review. After developing the first draft of the booklet,  
36  
37 patients, caregivers, and healthcare professionals provided feedback to improve the booklet into  
38  
39 its current format. A more thorough description of the booklet's development process can be  
40  
41 found below (see Phase 2 below).  
42  
43  
44  
45  
46

47 The booklet will be introduced to patients at the time of study recruitment (before ostomy  
48  
49 closure). Participants will be instructed to read through the booklet at least once prior to their  
50  
51 ostomy closure operation and will be encouraged to consult it as much as needed thereafter. In  
52  
53 addition to the informational booklet, participants will receive Bowel Symptom, Diet, and  
54  
55  
56  
57  
58  
59  
60

1  
2  
3 Loperamide diaries and will be instructed to use them whenever experiencing any symptoms of  
4  
5 bowel dysfunction, and for 2 weeks prior to each scheduled nurse phone call (please see the next  
6  
7 section below). The goal of these diaries is to assist participants in recognizing the underlying  
8  
9 patterns related to their symptoms so that they can optimize their self-management.  
10  
11

## 12 2. Nursing Support:

13  
14 Nursing support will be centralized from one institution and made available to  
15  
16 participants in the intervention group, by telephone and email. The study nurse has expertise in  
17  
18 rectal cancer management and postoperative bowel dysfunction. She will briefly review the  
19  
20 booklet content with participants by telephone at the beginning of the study (prior to ostomy  
21  
22 closure) and answer related questions. Postoperatively, the nurse will have scheduled telephone  
23  
24 calls with participants at 1-, 3-, 6-, 9-, and 12-months, to provide support and periodically review  
25  
26 their completed diaries for troubleshooting. Lastly, she will be available to speak with  
27  
28 participants in between scheduled calls, either by phone or by email.  
29  
30  
31

## 32 Standard Care Group

33  
34 Participants randomized to the standard care group will not have access to either the  
35  
36 informational booklet nor nursing support. Instead, they will only receive a paper copy (and/or  
37  
38 instructions for online access) of the Colorectal Cancer Association of Canada (CCAC) module  
39  
40 on “Living with Colorectal Cancer”. The standard care group will also receive the usual care for  
41  
42 LARS information and counseling that is routinely made available at their hospital, with  
43  
44 participating hospitals asked to provide a description of what constitutes “standard care” for  
45  
46 LARS. Due to the expected heterogeneity in institutional LARS practices, participating  
47  
48 institutions will be accounted for in the final statistical model in addition to stratified  
49  
50 randomization by institution.  
51  
52  
53  
54  
55  
56  
57  
58  
59  
60

### Data Collection

Baseline demographics, medical comorbidities, and disease and treatment characteristics will be obtained from chart review, including known predictors of bowel dysfunction (e.g., tumor height, neoadjuvant radiotherapy, type of proctectomy [total vs. partial mesorectal excision], reconstruction technique [straight anastomosis vs. neorectal reservoir], and anastomotic leak after proctectomy). The remaining data will be gathered from self-reported questionnaires at study time-points throughout the 12-month study period.

### Outcomes

Outcomes will be measured with the use of various PROMs and recorded into an online registry (REDCap) by a blinded assessor. PROMs captured at the same time-point will be completed as a single package. The schedule for all PROMs can be found in Table 1. The PROM package for each time-point will either be mailed to participants, disseminated via email, or completed over the phone, depending on participants' preferences. Participants will receive email and telephone reminders for incomplete questionnaires. The study timeline for both groups can be found in Figures 1 and 2. The following outcomes and PROMs will be collected:

#### 1. Quality of Life:

QoL will be measured using the EORTC-QLQ-C30, a self-report questionnaire developed to assess QoL for patients living with or beyond cancer. It consists of 30 items, which aggregate into 1 global QoL scale, 5 functional scales, 3 symptom scales, and 6 single items. The EORTC-QLQ-C30 has been well validated in individuals with rectal cancer and correlates significantly with LARS severity.<sup>5,8,9</sup>

#### 2. Symptom Changes:

1  
2  
3 The Measure Your Medical Outcome Profile (MYMOP2) is a patient-centered measure  
4 that assesses changes over time in a specific symptom identified as most bothersome to the  
5 patient.<sup>16,17</sup> The patient also identifies a daily activity that is being restricted or prevented by the  
6 symptom. Both the symptom and the activity are scored using a 6-point Likert-type scale in the  
7 last week.  
8  
9  
10  
11  
12  
13

### 14 15 3. Patient Activation: 16

17  
18 The Patient Activation Measure-13 (PAM-13) is a 13-item questionnaire aimed at  
19 determining the degree knowledge, skills, and confidence for self-management of healthcare.<sup>18</sup>  
20 Responses are based on a Likert scale ranging from “disagree strongly” to “agree strongly”, and  
21 the final score is a transformation ranging from 0 to 100 according to a conversion formula  
22 provided by the developers. Activation is then categorized into 1 of 4 groups based on their  
23 transformed score: Level 1, “overwhelmed and not ready to take an active role” ( $\leq 47.0$ ); Level 2,  
24 “realize they have a role to play, but lack the knowledge and confidence” (47.1-55.1); Level 3,  
25 “beginning to take action, but still lack confidence” (55.2-72.4); Level 4, “can manage their  
26 healthcare, but may struggle to maintain the behaviors” ( $\geq 72.5$ ).  
27  
28  
29  
30  
31  
32  
33  
34  
35  
36  
37  
38

### 39 4. Bowel Function: 40

41  
42 Bowel function will be measured postoperatively using three validated tools/questions.  
43 The LARS Score is a 5-item tool aimed at symptoms of bowel dysfunction, with each question  
44 weighted differently according to the perceived importance by patients. The scores of the 5  
45 questions sum to 42 points. The LARS Score allows the categorization of patients as having  
46 major (30-42 points), minor (21-29 points), or no LARS (0-20 points). The Cleveland Clinic  
47 Florida / Wexner Fecal Incontinence Score (WFIS) is a 5-item tool aimed at measuring the  
48  
49  
50  
51  
52  
53  
54  
55  
56  
57  
58  
59  
60

1  
2  
3 frequency of incontinence to gas and liquid or solid stools, and its consequences (pad wearing  
4 and lifestyle alterations). Each question ranges from 0 (never) to 4 (always) and the total score is  
5 measured out of 20. Lastly, each participant will be asked a single, validated, bowel-related QoL  
6 question: “Overall, how much does your bowel function affect your quality of life?” Responses  
7 categorize respondents into 1 of 3 grades: “not at all” (no impairment); “very little” (minor  
8 impairment); “somewhat” or “a lot” (major impairment). Bowel-related QoL is significantly  
9 correlated with both the LARS Score and general QoL as per previous studies.<sup>9</sup>

#### 20 5. Emotional Distress:

21  
22 Emotional distress will be measured using the Hospital Anxiety and Depression Scale  
23 (HADS), which has been validated in colorectal cancer survivors.<sup>19,20</sup> It includes 7 items aimed  
24 at assessing depression and 7 items for anxiety. Each item is scored 0-3, and is based on  
25 frequency of symptoms. The total score is out of 21, and individuals can be categorized as  
26 “normal” (0-7), “borderline abnormal” (8-10), or “abnormal” i.e., depressed or anxious (11-21).  
27  
28  
29  
30  
31  
32  
33

#### 34 6. Knowledge:

35  
36 Knowledge related to LARS will be measured using a short, investigator-generated,  
37 multiple-choice questionnaire. The items reflect key concepts in etiology/risk factors and  
38 management of LARS.  
39  
40  
41  
42

#### 43 7. Satisfaction:

44  
45 Satisfaction related to the LPCP (information and support related to LARS) will be  
46 assessed using a short, investigator-generated, 2-item questionnaire. Responses will be recorded  
47 using a 5-point Likert scale, ranging from “not satisfied” (1) to “very satisfied” (5).  
48  
49  
50  
51

#### 52 Statistical Analysis

1  
2  
3 Descriptive analyses will include means with standard deviations, medians with ranges,  
4  
5 or frequencies with proportions, where appropriate. Continuous outcomes will be compared  
6  
7 using a t-test or Wilcoxon rank-sum test and categorical outcomes using  $\chi^2$  tests. The treatment  
8  
9 effect on global QoL will be modeled using generalized estimating equations (GEE).<sup>21</sup> This  
10  
11 method accounts for 1) the within-subject correlation between responses at different time-points,  
12  
13 and 2) possible clustering of responses among patients from the same hospital. GEE models also  
14  
15 make use of all the available data, so that patients can contribute to the model if they have data  
16  
17 available for any single time-point. An appropriate correlation structure will be chosen using the  
18  
19 quasi-likelihood information criterion. The effect size, standard error, and 95% confidence  
20  
21 interval for the estimate of the treatment effect at 6 months will be reported.  
22  
23  
24  
25

### Power Analysis and Sample Size Calculations

26  
27  
28 The primary outcome of the study is global QoL at 6 months, as measured by the EORTC  
29  
30 QLQ-C30. Based on the largest available cohort of patients with QoL data who have undergone  
31  
32 restorative proctectomy for rectal cancer and who are ostomy-free, mean global QoL score is  
33  
34 assumed to be 77 (maximum possible score is 100) with a standard deviation of 19.<sup>9</sup> According  
35  
36 to the consensus guidelines on the use of the EORTC QLQ-C30 to power a randomized  
37  
38 controlled trial, a mean difference in global QoL of 10 points (small-medium treatment effect) is  
39  
40 the most appropriate expected effect-size for interventions aimed to improve QoL in cancer  
41  
42 patients.<sup>22</sup> Thus, with an alpha=0.05 and power=0.80, we estimate that 45 participants are  
43  
44 required in each arm of our study. Given the risk for attrition over the 6-month study period, the  
45  
46 adjusted final sample size accounting for a 30% attrition rate is 64 participants in each arm (128  
47  
48 patients in total).  
49  
50  
51  
52

### Registration



1  
2  
3 This trial was registered on clinicaltrials.gov on February 4, 2019 (no: NCT03828318).  
4  
5  
6  
7

## 8 **Phase 2: Development of Informational Booklet**

9

10 The first draft of the informational booklet was developed by a multidisciplinary team of  
11 healthcare professionals who care for patients with rectal cancer. The initiative was co-lead by a  
12 General Surgery resident (R.G.) and a Colorectal Surgery attending (M.B.), and included a senior  
13  
14 General Surgery resident (R.G.) and a Colorectal Surgery attending (M.B.), and included a senior  
15 colorectal cancer oncology pivot nurse, pelvic physiotherapist, and members of the McGill  
16  
17 University Patient Education Office. The booklet was designed to review important information  
18  
19 regarding the epidemiology, symptomatology, and management of LARS. The booklet was  
20  
21 written at a 6<sup>th</sup>-grade reading level, which is recommended by the American Medical Association  
22  
23 for any patient material,<sup>23</sup> and included original illustrations designed by our team.  
24  
25  
26  
27

28 An Institutional Review Board-approved qualitative study was subsequently undertaken  
29  
30 to evaluate the booklet. A single focus group with rectal cancer patients and their caregivers, as  
31  
32 well as individual semi-structured telephone interviews with healthcare professionals, were  
33  
34 conducted.  
35  
36  
37

38 Participants for the focus group were recruited from individual Colorectal Surgeons  
39  
40 practicing at a single institution. The focus group included 12 participants (six patients and their  
41  
42 caregivers/partners) and followed a semi-structured interview guide. Each patient was a  
43  
44 minimum of 6-months removed from ileostomy closure (if diverted) or proctectomy.  
45  
46

47 Participants' characteristics are reported in Table 2. The purpose of the focus group was to obtain  
48  
49 feedback regarding the first draft of the booklet, to better understand participants' current/past  
50  
51 experiences with LARS, and to incorporate changes into the booklet to meet the informational  
52  
53 needs of rectal cancer survivors. The focus group was audio-recorded and transcribed, and data  
54  
55  
56  
57  
58  
59

1  
2  
3 were analyzed using the grounded theory.<sup>24,25</sup> The constant comparative method was applied;  
4  
5 data from participants were coded based on emerging patterns, concepts, and themes to generate  
6  
7 theory, which was then analyzed and categorized accordingly so that descriptive statements  
8  
9 could be formed.<sup>25</sup> The principal findings from the thematic analysis of the focus group are  
10  
11 displayed in Table 3. Patients described the emotional difficulties of living with LARS and the  
12  
13 general lack of support and preparation they received from their healthcare team. They  
14  
15 unanimously supported the development and dissemination of the booklet, reporting that it  
16  
17 would have had a major impact on their outlook and knowledge regarding LARS in their first  
18  
19 year after surgery. Some of the feedback included more emphasis to be placed on expectation  
20  
21 management and emotional support, and they asked for more detail regarding enema use. They  
22  
23 also requested a list of healthcare providers who could support them in their LARS care, and  
24  
25 more examples for foods which may activate their LARS.  
26  
27  
28  
29

30  
31 Healthcare professionals from multiple institutions across North America were invited to  
32  
33 review the booklet as well. In total, 10 healthcare professionals comprised of seven Colorectal  
34  
35 Surgeons and three nurses in Gastrointestinal Oncology, and each was interviewed using a semi-  
36  
37 structured interview guide. Characteristics of the healthcare professionals are reported in Table 4.  
38  
39 The focus of these interviews was largely on content and management strategies; to ensure that  
40  
41 our booklet would be as comprehensive and inclusive as possible. Furthermore, healthcare  
42  
43 professionals were asked about the layout and structure, clinical applicability, and other means of  
44  
45 improving the booklet. Similar to the focus group, the interviews were recorded, and the same  
46  
47 methods were used for data analysis. The principal findings from the interviews are displayed in  
48  
49 Table 5. Healthcare professionals felt that the booklet was accurate and comprehensive, and that  
50  
51 it would compliment the role of a clinician/nurse in supporting patients with LARS. Several  
52  
53  
54  
55  
56  
57  
58  
59  
60

1  
2  
3 interviewees recommended additional medications and illustrations, but did not feel the layout or  
4  
5 structure needed to be further revised. Small changes in language were recommended as well  
6  
7 (e.g., “stoma” instead of “bag” – most healthcare professionals felt that patients understand the  
8  
9 meaning of stoma).  
10

11  
12 Based on the results of this qualitative study, the informational booklet was modified into  
13  
14 its final format.  
15

### 16 17 18 19 **Patient and Public Involvement**

20  
21 Patients were involved in the development of the informational booklet to be used as part  
22  
23 of the LPCP. Patients and the public were not involved in the design of the study; however, the  
24  
25 outcomes proposed in this study are specifically designed to assess participants’ experience with  
26  
27 LARS and the LPCP. The authors would also like to thank Dr.’s Steven D. Wexner, Patricia  
28  
29 Sylla, Mitchell Bernstein, as well as Holly Bonnette and Tracy Chornopyski, for their  
30  
31 contributions.  
32  
33  
34  
35  
36  
37

### 38 **Ethics and Dissemination**

39  
40 The Research Ethics Committee at the Integrated Health and Social Services Network  
41  
42 (CIUSSS) for West-Central Montreal (health network responsible for the Jewish General  
43  
44 Hospital) has approved the study protocol in its current format (MP-05-2019-1628).  
45  
46 Collaborating sites are currently submitting the protocol for approval with their local ethics  
47  
48 committees, and will not begin to recruit patients until full approval is obtained.  
49

50  
51 The results of this study will be presented at national and international meetings, and a  
52  
53 manuscript will be submitted for publication in a high-impact peer-reviewed journal. We  
54  
55  
56  
57  
58  
59

1  
2  
3 anticipate that the findings will inform the development of future rectal cancer survivorship  
4  
5 programs with a focus on bowel dysfunction, in an effort to improve the long-term QoL of  
6  
7 individuals with rectal cancer.  
8  
9

### 10 11 12 **Data Sharing Statement** 13

14  
15 At completion of the trial, relevant deidentified participant data will be made available  
16  
17 upon request (from the corresponding author, M.B.). The data may be re-used only upon strict  
18  
19 permission from the corresponding author.  
20  
21  
22  
23  
24  
25  
26  
27  
28  
29  
30  
31  
32  
33  
34  
35  
36  
37  
38  
39  
40  
41  
42  
43  
44  
45  
46  
47  
48  
49  
50  
51  
52  
53  
54  
55  
56  
57  
58  
59  
60

## References

1. Ricciardi R, Virnig BA, Madoff RD, et al. The status of radical proctectomy and sphincter-sparing surgery in the United States. *Dis Colon Rectum* 2007;50:1119-1127.
2. Tilney HS, Heriot AG, Purkayastha S, et al. A national perspective on the decline of abdominoperineal resection for rectal cancer. *Ann Surg* 2008;247:77-84.
3. Emmertsen KJ, Laurberg S. Low anterior resection syndrome score: development and validation of a symptom-based scoring system for bowel dysfunction after low anterior resection for rectal cancer. *Ann Surg* 2012;255:922-928.
4. Bryant CL, Lunniss PJ, Knowles CH, et al. Anterior resection syndrome. *Lancet Oncol* 2012;13:e403-408.
5. Emmertsen KJ, Laurbeg S; Rectal Cancer Function Study Group. Impact of bowel dysfunction on quality of life after sphincter-preserving resection for rectal cancer. *Br J Surg* 2013;100:1377-1387.
6. Battersby NJ, Bouliotis G, Emmertsen KJ, et al. Development and external validation of a nomogram and online tool to predict bowel dysfunction following restorative rectal cancer resection: the POLARS score. *Gut* 2018;67:688-696.
7. Chen TY, Wiltink LM, Nout RA, et al. Bowel function 14 years after proepertaive short-course radiotherapy and total mesorectal excision for rectal cancer: report of a multicenter randomized trial. *Clin Colorectal Cancer* 2015;14:106-114.
8. Juul T, Ahlberg M, Biondo S, et al. Low anterior resection syndrome and quality of life: an international multicenter study. *Dis Colon Rectum* 2014;57:585-591.

- 1  
2  
3 9. Battersby NJ, Juul T, Christensen P, et al. Predicting the risk of bowel-related quality-of-  
4  
5 life impairment after restorative resection for rectal cancer: a multicenter cross-sectional  
6  
7 study. *Dis Colon Rectum* 2016;59:270-280.  
8  
9
- 10 10. Faury S, Koleck M, Foucaud J, et al. Patient education interventions for colorectal cancer  
11  
12 patients with stoma: a systematic review. *Patient Educ Couns* 2017;100:1807-1819.  
13
- 14 11. Phatak UR, Li LT, Karanjawala B, et al. Systematic review of educational interventions  
15  
16 for ostomates. *Dis Colon Rectum* 2014;57:529-537.  
17  
18
- 19 12. Krouse RS, Grant M, McCorkle R, et al. A chronic care ostomy self-management  
20  
21 program for cancer survivors. *Psychooncology* 2016;25:574-581.  
22  
23
- 24 13. Herrinton LJ, Altschuler A, McMullen CK, et al. Conversations for providers caring for  
25  
26 patients with rectal cancer: comparison of long-term patient-centered outcomes for  
27  
28 patients with low rectal cancer facing ostomy or sphincter-sparing surgery. *Ca Cancer J*  
29  
30 *Clin* 2016;66:387-397.  
31  
32
- 33 14. Chan AW, Tetzlaff JM, Altman DG, et al. SPIRIT 2013 statement: defining standard  
34  
35 protocol items for clinical trials. *Ann Intern Med* 2013;158:200-207.  
36  
37
- 38 15. Garfinkle R, Wong-Chong N, Petrucci A, et al. Assessing the readability, quality and  
39  
40 accuracy of online health information for patients with Low Anterior Resection  
41  
42 Syndrome following surgery for rectal cancer. *Colorectal Dis* 2019;21:523-31.  
43  
44
- 45 16. Paterson C. Measuring outcomes in primary care: a patient generated measure,  
46  
47 MYMOP2, compared with SF-36 health survey. *BMJ* 1996;312:1016-1020.  
48
- 49 17. Paterson C, Britten N. In pursuit of patient-centered outcomes: a qualitative evaluation of  
50  
51 MYMOP2, measure yourself medical outcome profile. *J Health Serv Res Policy*  
52  
53 2000;5:27-36.  
54  
55  
56  
57  
58  
59  
60

18. Hibbard JH, Mahoney ER, Stockard J, et al. Development and testing of a short form of the patient activation measure. *Health Serv Res* 2005;40:1918-1930.
19. Aminisani N, Nikbakht H, Jafarabadi MA, et al. Depression, anxiety, and health related quality of life among colorectal cancer survivors. *J Gastrointest Oncol* 2017;8:81-88.
20. Tsunoda A, Nakao K, Hiratsuka K, et al. Anxiety, depression and quality of life in colorectal cancer patients. *Int J Clin Oncol* 2005;10:411-417.
21. Liang K and Zeger SL. Longitudinal data analysis using generalized linear models. *Biometrika* 1986;73:13-22.
22. Cocks K, King MT, Velikova G, et al. Evidence-based guidelines for determination of sample size and interpretation of the European Organisation of the Research and Treatment of Cancer quality of life questionnaire core 30. *J Clin Oncol* 2001;29:89-96.
23. Weiss B. *Health literacy and patient safety: help patients understand*. 2<sup>nd</sup> ed. Chicago, IL: American Medical Association Foundation / American Medical Association; 2007.
24. Morse JM, Field PA. *Nursing research: the application of qualitative research*. 2<sup>nd</sup> ed. United Kingdom: Nelson Thornes; 1996.
25. Rabiee F. Focus-group interview and data analysis. *Proc Nutr Soc* 2004;63:655-60.
26. Taylor SJ, Bogdan R. *Introduction to qualitative research methods: a guidebook and resource*. 3<sup>rd</sup> ed. New York: Wiley; 1998.

### Author Contributions

RG, CGL, JP, JFJ, LGB, ASL, NM, JF, GG, CAV, SRB, and MB contributed to the design of the study. RG, CGL, JP, LGB, ASL, NM, JF, GG, CAV, and MB participated in qualitative data acquisition. RG, CGL, JFJ, SRB, and MB contributed to the data analysis plan. RG, JP, LGB, ASL, NM, JF, GG, CAV, and MB were involved in obtaining ethical approval. RG and MB prepared the first draft of the manuscript. RG, CGL, JP, JFJ, LGB, ASL, NM, JF, GG, CAV, SRB, and MB contributed to, and approved, the final version of the manuscript.

### Funding

This work is supported by a McGill University Rossy Cancer Network Cancer Quality and Innovation research grant and a Canadian Society of Colon and Rectal Surgeons research grant.

### Competing Interests Statement

ASL receives travel stipends from Merck and Servier, and is on the advisory committee of Novadaq. JFJ received a research grant from Merck and fees for consulting from Shionogi. RG, CGL, JP, JFJ, LGB, NM, JF, GG, CAV, SRB, and MB have no relevant competing interests to declare.

### Word Count

3,205



Table 1 – Schedule of Patient-Reported Outcome Measures

|                           | Preoperatively | 1 month | 3 months | 6 months | 12 months |
|---------------------------|----------------|---------|----------|----------|-----------|
| EORTC-QLQ-C30             | X              | X       | X        | X        | X         |
| MYMOP2                    |                | X       |          | X        | X         |
| PAM-13                    | X              | X       |          | X        | X         |
| LARS Score,<br>WFIS, BQoL |                | X       | X        | X        | X         |
| HADS                      | X              | X       |          | X        | X         |
| Knowledge                 | X              | X       |          | X        |           |
| Satisfaction              |                |         |          | X        |           |

EORTC-QLQ-C30 = European Organization for Research and Treatment of Cancer Quality of Life Questionnaire – Core 30

MYMOP2 = Measure Your Medical Outcome Profile

PAM-13 = Patient Activation Measure

LARS Score = Low Anterior Resection Syndrome Score

WFIS = Wexner Fecal Incontinence Score

BQoL = Bowel-Related Quality of Life

HADS = Hospital Anxiety and Depression Scale

Table 2 – Characteristics of patient participants in focus group (caregivers not included)

| <b>Characteristics</b>                                      | <b>n = 6</b> |
|-------------------------------------------------------------|--------------|
| Age, years, median (range)                                  | 61 (32-71)   |
| Gender, n                                                   | -            |
| Male                                                        | 4            |
| Female                                                      | 2            |
| Neoadjuvant radiotherapy, n                                 | 5            |
| Diverting loop ileostomy, n                                 | 5            |
| Extent of mesorectal excision, n                            | -            |
| Partial mesorectal excision                                 | 0            |
| Total mesorectal excision                                   | 6            |
| Anastomotic height, n                                       | -            |
| Colo-Rectal Anastomosis                                     | 3            |
| Colo-Anal Anastomosis                                       | 3            |
| Anastomotic leak, n                                         | 1            |
| Months since proctectomy, median (range)                    | 15 (7-22)    |
| LARS Score, median (range)                                  | 28 (12-39)   |
| LARS Score severity, n                                      | -            |
| Major                                                       | 3            |
| Minor                                                       | 2            |
| None                                                        | 1            |
| Overall, how much does your bowel function affect your QoL? | -            |
| Not at all / very little                                    | 2            |
| Somewhat                                                    | 2            |
| A lot                                                       | 2            |
| EORTC global quality of life, median (range)                | 83 (50-100)  |

QoL = quality of life; EORTC-QLQ-C30 = European Organization for Research and Treatment of Cancer Quality of Life Questionnaire – Core 30

Table 3 – Principal findings from thematic analysis of focus group with patients and caregivers

|                                                                                                |                                                                                                                                   |
|------------------------------------------------------------------------------------------------|-----------------------------------------------------------------------------------------------------------------------------------|
| LARS is as much a psychological disorder as it is a physical condition                         | Participants felt underprepared for their new bowel function, which greatly contributed to their anxiety                          |
|                                                                                                | Participants felt alone and isolated, as if they were the only patients experiencing these symptoms                               |
|                                                                                                | Participants were never explained that symptoms may improve; most felt extremely hopeless in the first few months postoperatively |
| The booklet was easy to read and follow                                                        | Participants found that the booklet was written at an appropriate level for patients                                              |
|                                                                                                | Participants found the images extremely helpful in understanding how, and why, LARS occurs                                        |
|                                                                                                | Participants felt that the booklet was complete, and was a perfect length                                                         |
| Information was lacking in certain keys areas                                                  | Participants wanted more emphasis to be placed on emotional wellbeing in the booklet                                              |
|                                                                                                | Participants wanted more examples of foods that could trigger their LARS, as well as more detail on how to use and find an enema  |
|                                                                                                | Participants agreed that it is vital to have a dedicated nurse to review the booklet and provide additional support               |
| The booklet is an excellent resource that would have made a big difference in their first year | The booklet's greatest impact is in terms of expectation management and psychological reassurance                                 |
|                                                                                                | Participants agreed that they would have consulted the booklet frequently in the first year after surgery                         |

LARS: Low Anterior Resection Syndrome

Table 4 – Characteristics of interviewed healthcare professionals

| <b>Characteristics</b>                                        | <b>n = 10</b> |
|---------------------------------------------------------------|---------------|
| Gender, n                                                     | -             |
| Male                                                          | 5             |
| Female                                                        | 5             |
| Practice, n                                                   | -             |
| Colorectal Surgeon                                            | 7             |
| Nurse                                                         | 3             |
| Experience, years, median (range)                             | -             |
| Colorectal Surgeon                                            | 16 (9-21)     |
| Nurse                                                         | 19 (4-22)     |
| Annual rectal cancer volume, patients, median (range)         | -             |
| Colorectal Surgeon                                            | 30 (20-50)    |
| Nurse                                                         | 50 (50-75)    |
| Time spent per visit discussing LARS, minutes, median (range) | -             |
| Colorectal Surgeon                                            | 8 (5-20)      |
| Nurse                                                         | 23 (30-45)    |

Table 5 – Principal findings from thematic analysis of semi-structured interviews with healthcare professionals

|                                                            |                                                                                                                                              |
|------------------------------------------------------------|----------------------------------------------------------------------------------------------------------------------------------------------|
| Barriers to effectively educating patients on LARS         | All HCPs felt that “insufficient time in their schedules” was the most significant barrier to adequately discussing LARS with their patients |
|                                                            | Most HCPs felt that information provided to patients in clinic is often not retained                                                         |
|                                                            | Most HCPs did not have a consistent resource on LARS to offer to patients                                                                    |
| The booklet is accurate, comprehensive, and easy to read   | All HCPs felt that the major points on LARS were covered                                                                                     |
|                                                            | Most HCPs felt that less information on rectal cancer was needed in the booklet                                                              |
|                                                            | All HCPs felt that the illustrations were accurate and helpful in explaining LARS                                                            |
|                                                            | Several additional medications were recommended (e.g., codeine, amitriptyline)                                                               |
| The booklet is a clinically relevant resource for patients | All HCPs would give this booklet to their patients, and believe that it would a helpful supportive resource                                  |
|                                                            | All HCPs would give it just prior to surgery (or ileostomy closure, if a stoma was performed)                                                |

LARS = Low Anterior Resection Syndrome; HCP = healthcare professional

1  
2  
3 **Figures Legend**  
4

5 Figure 1 – Study timeline for patients in the LARS Patient-Centered Program  
6

7  
8 Figure 2 – Study timeline for patients in the Standard Care Group  
9  
10  
11  
12  
13  
14  
15  
16  
17  
18  
19  
20  
21  
22  
23  
24  
25  
26  
27  
28  
29  
30  
31  
32  
33  
34  
35  
36  
37  
38  
39  
40  
41  
42  
43  
44  
45  
46  
47  
48  
49  
50  
51  
52  
53  
54  
55  
56  
57  
58  
59  
60

# LARS STUDY TIMELINE

## LARS Patient-Centered Program

1  
2  
3  
4  
5  
6  
7  
8  
9  
10  
11  
12  
13  
14  
15  
16  
17  
18  
19  
20  
21  
22  
23  
24  
25  
26  
27  
28  
29  
30  
31  
32  
33  
34  
35  
36  
37  
38  
39  
40  
41  
42  
43  
44  
45  
46  
47

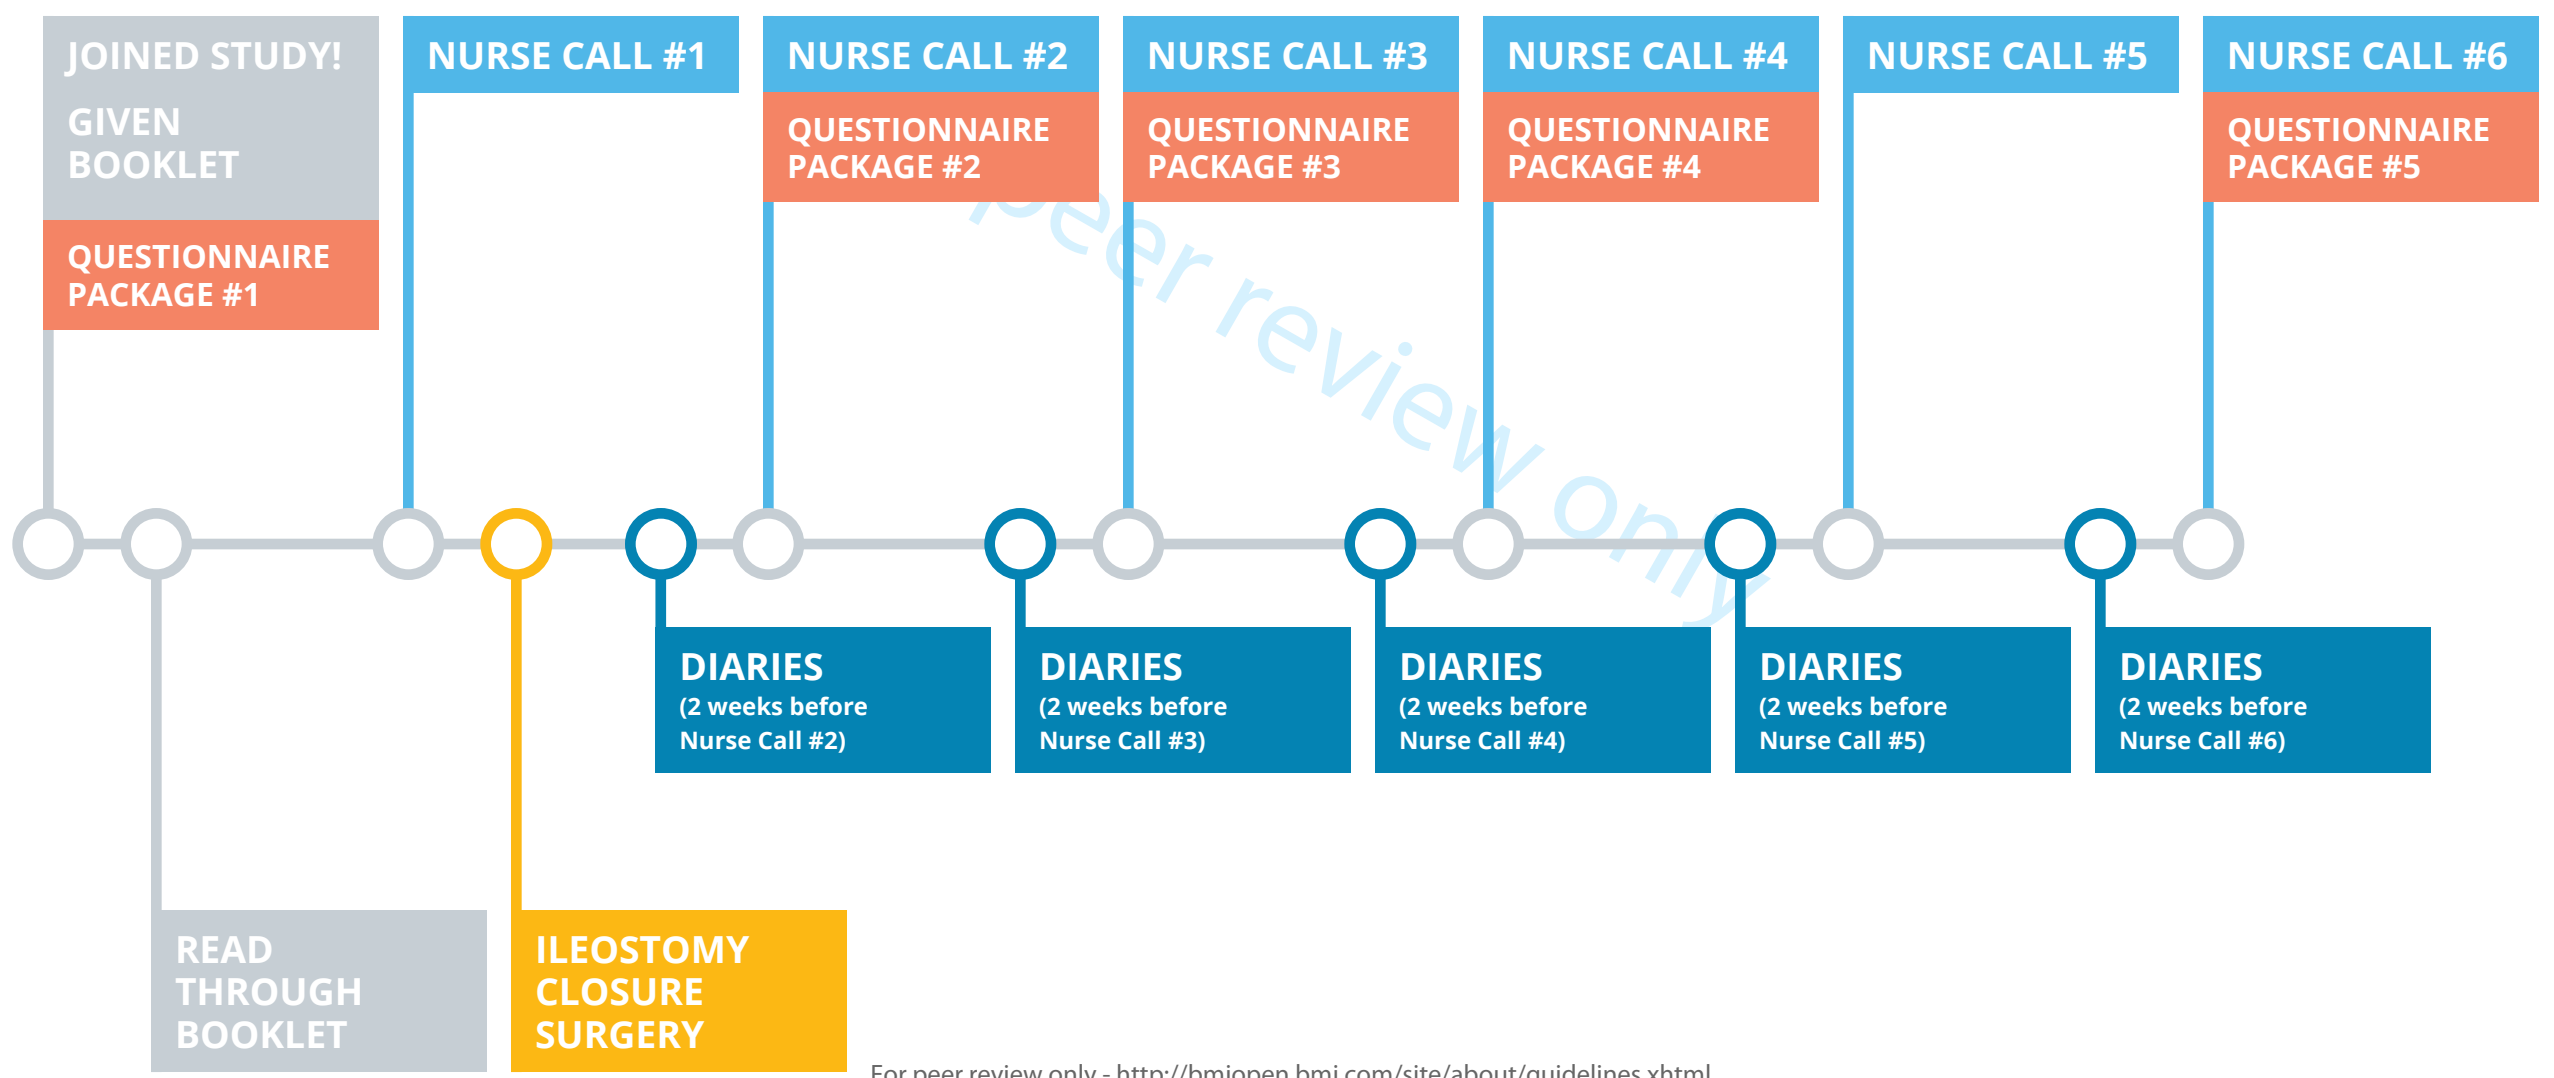

# LARS STUDY TIMELINE

## Standard Care

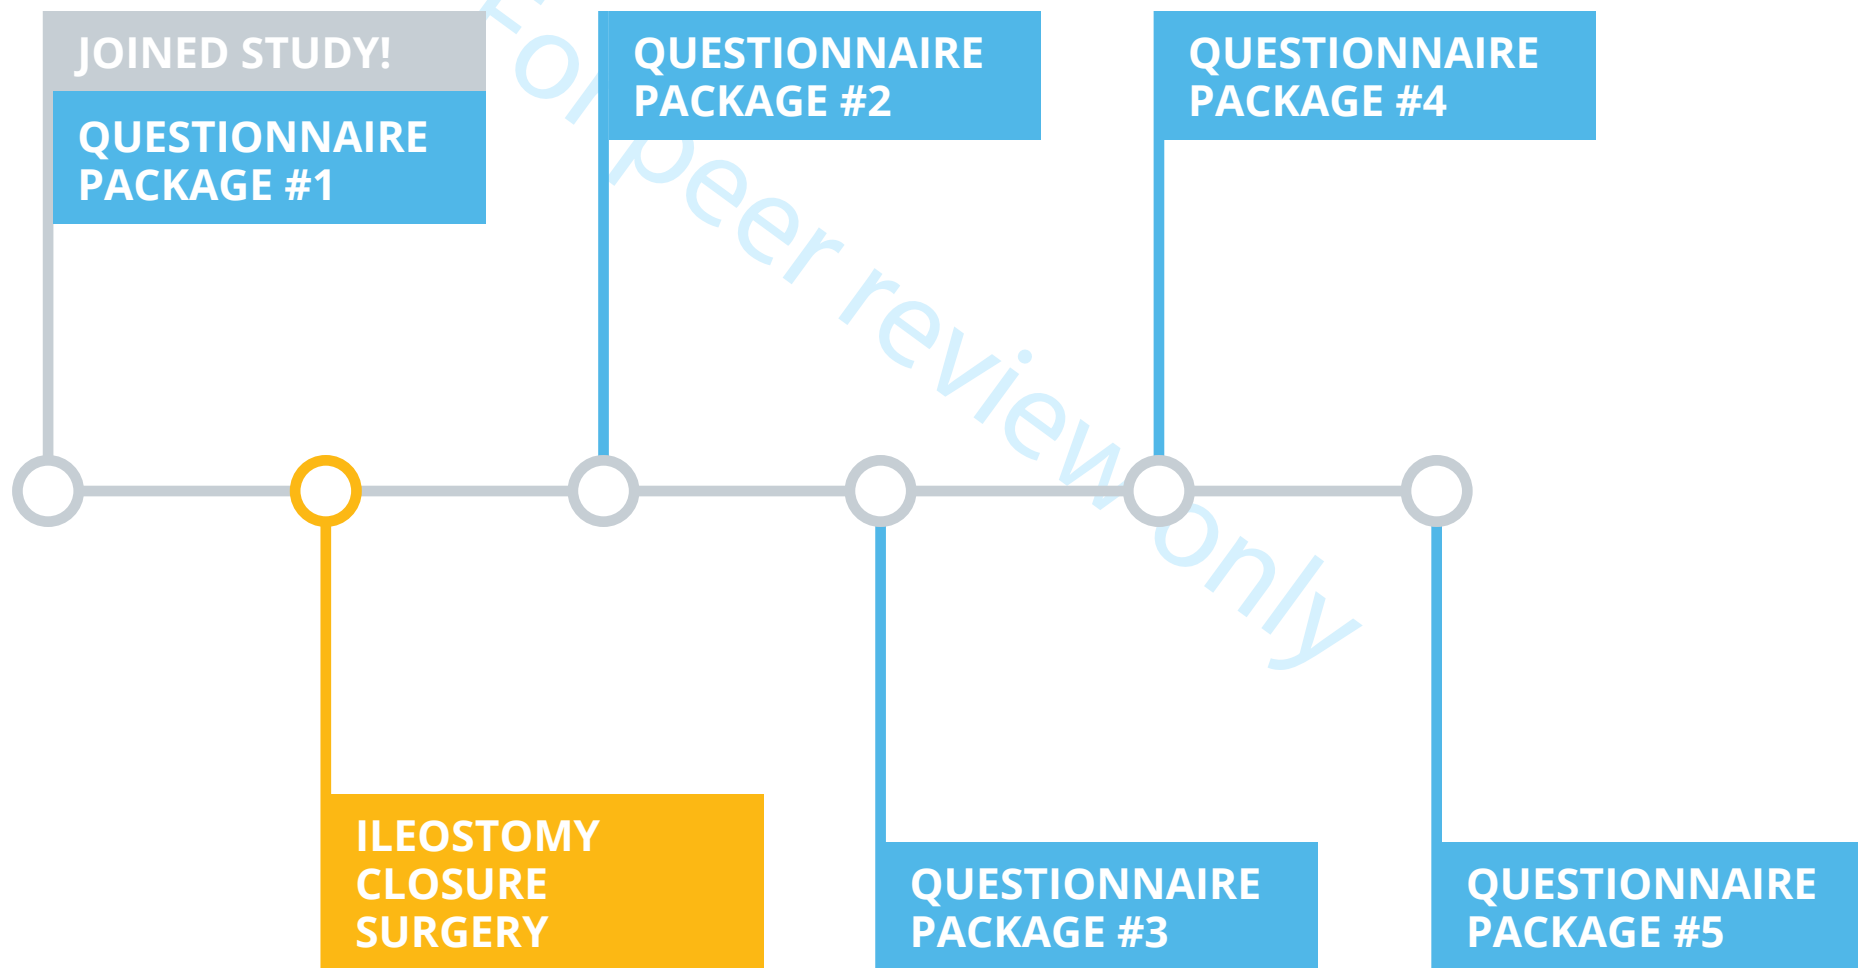



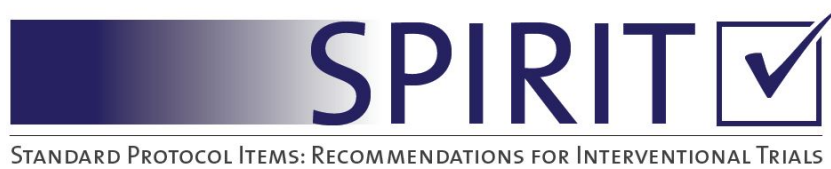

SPIRIT 2013 Checklist: Recommended items to address in a clinical trial protocol and related documents\*

| Section/item                      | Item No | Description                                                                                                                                                                                                                                                                                                       |
|-----------------------------------|---------|-------------------------------------------------------------------------------------------------------------------------------------------------------------------------------------------------------------------------------------------------------------------------------------------------------------------|
| <b>Administrative information</b> |         |                                                                                                                                                                                                                                                                                                                   |
| Title                             | 1       | Descriptive title identifying the study design, population, interventions, and, if applicable, trial acronym<br><b>Yes – page 1</b>                                                                                                                                                                               |
| Trial registration                | 2a      | Trial identifier and registry name. If not yet registered, name of intended registry<br><b>Yes – page 3 and 14</b>                                                                                                                                                                                                |
|                                   | 2b      | All items from the World Health Organization Trial Registration Data Set                                                                                                                                                                                                                                          |
| Protocol version                  | 3       | Date and version identifier                                                                                                                                                                                                                                                                                       |
| Funding                           | 4       | Sources and types of financial, material, and other support<br><b>Yes – page 21</b>                                                                                                                                                                                                                               |
| Roles and responsibilities        | 5a      | Names, affiliations, and roles of protocol contributors<br><b>Yes – page 21</b>                                                                                                                                                                                                                                   |
|                                   | 5b      | Name and contact information for the trial sponsor<br><b>Not applicable</b>                                                                                                                                                                                                                                       |
|                                   | 5c      | Role of study sponsor and funders, if any, in study design; collection, management, analysis, and interpretation of data; writing of the report; and the decision to submit the report for publication, including whether they will have ultimate authority over any of these activities<br><b>Not applicable</b> |
|                                   | 5d      | Composition, roles, and responsibilities of the coordinating centre, steering committee, endpoint adjudication committee, data management team, and other individuals or groups overseeing the trial, if applicable (see Item 21a for data monitoring committee)                                                  |
| <b>Introduction</b>               |         |                                                                                                                                                                                                                                                                                                                   |
| Background and rationale          | 6a      | Description of research question and justification for undertaking the trial, including summary of relevant studies (published and unpublished) examining benefits and harms for each intervention<br><b>Yes – pages 5 and 6</b>                                                                                  |

|    |                                                           |     |                                                                                                                                                                                                                                                                                                                                                                                |
|----|-----------------------------------------------------------|-----|--------------------------------------------------------------------------------------------------------------------------------------------------------------------------------------------------------------------------------------------------------------------------------------------------------------------------------------------------------------------------------|
| 1  |                                                           | 6b  | Explanation for choice of comparators                                                                                                                                                                                                                                                                                                                                          |
| 2  |                                                           |     |                                                                                                                                                                                                                                                                                                                                                                                |
| 3  |                                                           |     |                                                                                                                                                                                                                                                                                                                                                                                |
| 4  | Objectives                                                | 7   | Specific objectives or hypotheses                                                                                                                                                                                                                                                                                                                                              |
| 5  |                                                           |     | <b>Yes – page 7</b>                                                                                                                                                                                                                                                                                                                                                            |
| 6  |                                                           |     |                                                                                                                                                                                                                                                                                                                                                                                |
| 7  | Trial design                                              | 8   | Description of trial design including type of trial (eg, parallel group, crossover, factorial, single group), allocation ratio, and framework (eg, superiority, equivalence, noninferiority, exploratory)                                                                                                                                                                      |
| 8  |                                                           |     |                                                                                                                                                                                                                                                                                                                                                                                |
| 9  |                                                           |     |                                                                                                                                                                                                                                                                                                                                                                                |
| 10 |                                                           |     |                                                                                                                                                                                                                                                                                                                                                                                |
| 11 |                                                           |     | <b>Yes – pages 7, 8 and 9</b>                                                                                                                                                                                                                                                                                                                                                  |
| 12 |                                                           |     |                                                                                                                                                                                                                                                                                                                                                                                |
| 13 | <b>Methods: Participants, interventions, and outcomes</b> |     |                                                                                                                                                                                                                                                                                                                                                                                |
| 14 |                                                           |     |                                                                                                                                                                                                                                                                                                                                                                                |
| 15 | Study setting                                             | 9   | Description of study settings (eg, community clinic, academic hospital) and list of countries where data will be collected. Reference to where list of study sites can be obtained                                                                                                                                                                                             |
| 16 |                                                           |     |                                                                                                                                                                                                                                                                                                                                                                                |
| 17 |                                                           |     |                                                                                                                                                                                                                                                                                                                                                                                |
| 18 |                                                           |     |                                                                                                                                                                                                                                                                                                                                                                                |
| 19 |                                                           |     | <b>Yes – page 7</b>                                                                                                                                                                                                                                                                                                                                                            |
| 20 |                                                           |     |                                                                                                                                                                                                                                                                                                                                                                                |
| 21 | Eligibility criteria                                      | 10  | Inclusion and exclusion criteria for participants. If applicable, eligibility criteria for study centres and individuals who will perform the interventions (eg, surgeons, psychotherapists)                                                                                                                                                                                   |
| 22 |                                                           |     |                                                                                                                                                                                                                                                                                                                                                                                |
| 23 |                                                           |     |                                                                                                                                                                                                                                                                                                                                                                                |
| 24 |                                                           |     |                                                                                                                                                                                                                                                                                                                                                                                |
| 25 |                                                           |     | <b>Yes – page 7</b>                                                                                                                                                                                                                                                                                                                                                            |
| 26 |                                                           |     |                                                                                                                                                                                                                                                                                                                                                                                |
| 27 | Interventions                                             | 11a | Interventions for each group with sufficient detail to allow replication, including how and when they will be administered                                                                                                                                                                                                                                                     |
| 28 |                                                           |     |                                                                                                                                                                                                                                                                                                                                                                                |
| 29 |                                                           |     | <b>Yes – pages 8, 9 and 10</b>                                                                                                                                                                                                                                                                                                                                                 |
| 30 |                                                           |     |                                                                                                                                                                                                                                                                                                                                                                                |
| 31 |                                                           | 11b | Criteria for discontinuing or modifying allocated interventions for a given trial participant (eg, drug dose change in response to harms, participant request, or improving/worsening disease)                                                                                                                                                                                 |
| 32 |                                                           |     |                                                                                                                                                                                                                                                                                                                                                                                |
| 33 |                                                           |     |                                                                                                                                                                                                                                                                                                                                                                                |
| 34 |                                                           |     |                                                                                                                                                                                                                                                                                                                                                                                |
| 35 |                                                           |     | <b>Not applicable</b>                                                                                                                                                                                                                                                                                                                                                          |
| 36 |                                                           |     |                                                                                                                                                                                                                                                                                                                                                                                |
| 37 |                                                           | 11c | Strategies to improve adherence to intervention protocols, and any procedures for monitoring adherence (eg, drug tablet return, laboratory tests)                                                                                                                                                                                                                              |
| 38 |                                                           |     |                                                                                                                                                                                                                                                                                                                                                                                |
| 39 |                                                           |     |                                                                                                                                                                                                                                                                                                                                                                                |
| 40 |                                                           |     |                                                                                                                                                                                                                                                                                                                                                                                |
| 41 |                                                           |     | <b>Yes – pages 10 and 13</b>                                                                                                                                                                                                                                                                                                                                                   |
| 42 |                                                           |     |                                                                                                                                                                                                                                                                                                                                                                                |
| 43 |                                                           | 11d | Relevant concomitant care and interventions that are permitted or prohibited during the trial                                                                                                                                                                                                                                                                                  |
| 44 |                                                           |     |                                                                                                                                                                                                                                                                                                                                                                                |
| 45 |                                                           |     | <b>Yes – pages 8 and 9</b>                                                                                                                                                                                                                                                                                                                                                     |
| 46 |                                                           |     |                                                                                                                                                                                                                                                                                                                                                                                |
| 47 | Outcomes                                                  | 12  | Primary, secondary, and other outcomes, including the specific measurement variable (eg, systolic blood pressure), analysis metric (eg, change from baseline, final value, time to event), method of aggregation (eg, median, proportion), and time point for each outcome. Explanation of the clinical relevance of chosen efficacy and harm outcomes is strongly recommended |
| 48 |                                                           |     |                                                                                                                                                                                                                                                                                                                                                                                |
| 49 |                                                           |     |                                                                                                                                                                                                                                                                                                                                                                                |
| 50 |                                                           |     |                                                                                                                                                                                                                                                                                                                                                                                |
| 51 |                                                           |     |                                                                                                                                                                                                                                                                                                                                                                                |
| 52 |                                                           |     |                                                                                                                                                                                                                                                                                                                                                                                |
| 53 |                                                           |     |                                                                                                                                                                                                                                                                                                                                                                                |
| 54 |                                                           |     | <b>Yes – pages 10, 11 and 12</b>                                                                                                                                                                                                                                                                                                                                               |
| 55 |                                                           |     |                                                                                                                                                                                                                                                                                                                                                                                |
| 56 |                                                           |     |                                                                                                                                                                                                                                                                                                                                                                                |
| 57 |                                                           |     |                                                                                                                                                                                                                                                                                                                                                                                |
| 58 |                                                           |     |                                                                                                                                                                                                                                                                                                                                                                                |
| 59 |                                                           |     |                                                                                                                                                                                                                                                                                                                                                                                |
| 60 |                                                           |     |                                                                                                                                                                                                                                                                                                                                                                                |

|    |             |    |                                                                      |
|----|-------------|----|----------------------------------------------------------------------|
| 1  |             |    |                                                                      |
| 2  | Participant | 13 | Time schedule of enrolment, interventions (including any run-ins and |
| 3  | timeline    |    | washouts), assessments, and visits for participants. A schematic     |
| 4  |             |    | diagram is highly recommended (see Figure)                           |
| 5  |             |    | <b>Yes – Figures 1 and 2</b>                                         |
| 6  |             |    |                                                                      |
| 7  | Sample size | 14 | Estimated number of participants needed to achieve study objectives  |
| 8  |             |    | and how it was determined, including clinical and statistical        |
| 9  |             |    | assumptions supporting any sample size calculations                  |
| 10 |             |    | <b>Yes – page 13</b>                                                 |
| 11 |             |    |                                                                      |
| 12 |             |    |                                                                      |
| 13 | Recruitment | 15 | Strategies for achieving adequate participant enrolment to reach     |
| 14 |             |    | target sample size                                                   |
| 15 |             |    | <b>Yes – page 13</b>                                                 |
| 16 |             |    |                                                                      |

### Methods: Assignment of interventions (for controlled trials)

#### Allocation:

|    |                |     |                                                                         |
|----|----------------|-----|-------------------------------------------------------------------------|
| 21 |                |     |                                                                         |
| 22 | Sequence       | 16a | Method of generating the allocation sequence (eg, computer-             |
| 23 | generation     |     | generated random numbers), and list of any factors for stratification.  |
| 24 |                |     | To reduce predictability of a random sequence, details of any planned   |
| 25 |                |     | restriction (eg, blocking) should be provided in a separate document    |
| 26 |                |     | that is unavailable to those who enrol participants or assign           |
| 27 |                |     | interventions                                                           |
| 28 |                |     | <b>Yes – page 7 and 8</b>                                               |
| 29 |                |     |                                                                         |
| 30 |                |     |                                                                         |
| 31 | Allocation     | 16b | Mechanism of implementing the allocation sequence (eg, central          |
| 32 | concealment    |     | telephone; sequentially numbered, opaque, sealed envelopes),            |
| 33 | mechanism      |     | describing any steps to conceal the sequence until interventions are    |
| 34 |                |     | assigned                                                                |
| 35 |                |     | <b>Yes – page 7 and 8</b>                                               |
| 36 |                |     |                                                                         |
| 37 |                |     |                                                                         |
| 38 | Implementation | 16c | Who will generate the allocation sequence, who will enrol participants, |
| 39 |                |     | and who will assign participants to interventions                       |
| 40 |                |     | <b>Yes – page 7 and 8</b>                                               |
| 41 |                |     |                                                                         |
| 42 | Blinding       | 17a | Who will be blinded after assignment to interventions (eg, trial        |
| 43 | (masking)      |     | participants, care providers, outcome assessors, data analysts), and    |
| 44 |                |     | how                                                                     |
| 45 |                |     | <b>Yes – page 10</b>                                                    |
| 46 |                |     |                                                                         |
| 47 |                |     |                                                                         |
| 48 |                | 17b | If blinded, circumstances under which unblinding is permissible, and    |
| 49 |                |     | procedure for revealing a participant's allocated intervention during   |
| 50 |                |     | the trial                                                               |
| 51 |                |     | <b>Not applicable</b>                                                   |
| 52 |                |     |                                                                         |
| 53 |                |     |                                                                         |
| 54 |                |     |                                                                         |

### Methods: Data collection, management, and analysis

|    |                            |     |                                                                          |
|----|----------------------------|-----|--------------------------------------------------------------------------|
| 1  |                            |     |                                                                          |
| 2  | Data collection            | 18a | Plans for assessment and collection of outcome, baseline, and other      |
| 3  | methods                    |     | trial data, including any related processes to promote data quality (eg, |
| 4  |                            |     | duplicate measurements, training of assessors) and a description of      |
| 5  |                            |     | study instruments (eg, questionnaires, laboratory tests) along with      |
| 6  |                            |     | their reliability and validity, if known. Reference to where data        |
| 7  |                            |     | collection forms can be found, if not in the protocol                    |
| 8  |                            |     | <b>Yes – pages 10, 11 and 12</b>                                         |
| 9  |                            |     |                                                                          |
| 10 |                            |     |                                                                          |
| 11 |                            | 18b | Plans to promote participant retention and complete follow-up,           |
| 12 |                            |     | including list of any outcome data to be collected for participants who  |
| 13 |                            |     | discontinue or deviate from intervention protocols                       |
| 14 |                            |     | <b>Yes – page 10</b>                                                     |
| 15 |                            |     |                                                                          |
| 16 |                            |     |                                                                          |
| 17 | Data                       | 19  | Plans for data entry, coding, security, and storage, including any       |
| 18 | management                 |     | related processes to promote data quality (eg, double data entry;        |
| 19 |                            |     | range checks for data values). Reference to where details of data        |
| 20 |                            |     | management procedures can be found, if not in the protocol               |
| 21 |                            |     |                                                                          |
| 22 |                            |     |                                                                          |
| 23 | Statistical                | 20a | Statistical methods for analysing primary and secondary outcomes.        |
| 24 | methods                    |     | Reference to where other details of the statistical analysis plan can be |
| 25 |                            |     | found, if not in the protocol                                            |
| 26 |                            |     | <b>Yes – page 13</b>                                                     |
| 27 |                            |     |                                                                          |
| 28 |                            | 20b | Methods for any additional analyses (eg, subgroup and adjusted           |
| 29 |                            |     | analyses)                                                                |
| 30 |                            |     | <b>Yes – page 13</b>                                                     |
| 31 |                            |     |                                                                          |
| 32 |                            | 20c | Definition of analysis population relating to protocol non-adherence     |
| 33 |                            |     | (eg, as randomised analysis), and any statistical methods to handle      |
| 34 |                            |     | missing data (eg, multiple imputation)                                   |
| 35 |                            |     | <b>Yes – page 13</b>                                                     |
| 36 |                            |     |                                                                          |
| 37 |                            |     |                                                                          |
| 38 |                            |     |                                                                          |
| 39 | <b>Methods: Monitoring</b> |     |                                                                          |
| 40 |                            |     |                                                                          |
| 41 | Data monitoring            | 21a | Composition of data monitoring committee (DMC); summary of its role      |
| 42 |                            |     | and reporting structure; statement of whether it is independent from     |
| 43 |                            |     | the sponsor and competing interests; and reference to where further      |
| 44 |                            |     | details about its charter can be found, if not in the protocol.          |
| 45 |                            |     | Alternatively, an explanation of why a DMC is not needed                 |
| 46 |                            |     |                                                                          |
| 47 |                            | 21b | Description of any interim analyses and stopping guidelines, including   |
| 48 |                            |     | who will have access to these interim results and make the final         |
| 49 |                            |     | decision to terminate the trial                                          |
| 50 |                            |     | <b>Not performed</b>                                                     |
| 51 |                            |     |                                                                          |
| 52 |                            |     |                                                                          |
| 53 | Harms                      | 22  | Plans for collecting, assessing, reporting, and managing solicited and   |
| 54 |                            |     | spontaneously reported adverse events and other unintended effects       |
| 55 |                            |     | of trial interventions or trial conduct                                  |
| 56 |                            |     | <b>Not applicable</b>                                                    |
| 57 |                            |     |                                                                          |
| 58 |                            |     |                                                                          |
| 59 |                            |     |                                                                          |
| 60 |                            |     |                                                                          |

|    |                                 |     |                                                                                                                                                                                                                                                                                                                     |
|----|---------------------------------|-----|---------------------------------------------------------------------------------------------------------------------------------------------------------------------------------------------------------------------------------------------------------------------------------------------------------------------|
| 1  |                                 |     |                                                                                                                                                                                                                                                                                                                     |
| 2  | Auditing                        | 23  | Frequency and procedures for auditing trial conduct, if any, and whether the process will be independent from investigators and the sponsor                                                                                                                                                                         |
| 3  |                                 |     |                                                                                                                                                                                                                                                                                                                     |
| 4  |                                 |     |                                                                                                                                                                                                                                                                                                                     |
| 5  |                                 |     |                                                                                                                                                                                                                                                                                                                     |
| 6  |                                 |     |                                                                                                                                                                                                                                                                                                                     |
| 7  | <b>Ethics and dissemination</b> |     |                                                                                                                                                                                                                                                                                                                     |
| 8  |                                 |     |                                                                                                                                                                                                                                                                                                                     |
| 9  | Research ethics approval        | 24  | Plans for seeking research ethics committee/institutional review board (REC/IRB) approval<br><b>Yes – page 16</b>                                                                                                                                                                                                   |
| 10 |                                 |     |                                                                                                                                                                                                                                                                                                                     |
| 11 |                                 |     |                                                                                                                                                                                                                                                                                                                     |
| 12 |                                 |     |                                                                                                                                                                                                                                                                                                                     |
| 13 | Protocol amendments             | 25  | Plans for communicating important protocol modifications (eg, changes to eligibility criteria, outcomes, analyses) to relevant parties (eg, investigators, REC/IRBs, trial participants, trial registries, journals, regulators)<br><b>Yes – page 16</b>                                                            |
| 14 |                                 |     |                                                                                                                                                                                                                                                                                                                     |
| 15 |                                 |     |                                                                                                                                                                                                                                                                                                                     |
| 16 |                                 |     |                                                                                                                                                                                                                                                                                                                     |
| 17 |                                 |     |                                                                                                                                                                                                                                                                                                                     |
| 18 |                                 |     |                                                                                                                                                                                                                                                                                                                     |
| 19 |                                 |     |                                                                                                                                                                                                                                                                                                                     |
| 20 | Consent or assent               | 26a | Who will obtain informed consent or assent from potential trial participants or authorised surrogates, and how (see Item 32)                                                                                                                                                                                        |
| 21 |                                 |     |                                                                                                                                                                                                                                                                                                                     |
| 22 |                                 |     |                                                                                                                                                                                                                                                                                                                     |
| 23 |                                 | 26b | Additional consent provisions for collection and use of participant data and biological specimens in ancillary studies, if applicable<br><b>Not applicable</b>                                                                                                                                                      |
| 24 |                                 |     |                                                                                                                                                                                                                                                                                                                     |
| 25 |                                 |     |                                                                                                                                                                                                                                                                                                                     |
| 26 |                                 |     |                                                                                                                                                                                                                                                                                                                     |
| 27 | Confidentiality                 | 27  | How personal information about potential and enrolled participants will be collected, shared, and maintained in order to protect confidentiality before, during, and after the trial                                                                                                                                |
| 28 |                                 |     |                                                                                                                                                                                                                                                                                                                     |
| 29 |                                 |     |                                                                                                                                                                                                                                                                                                                     |
| 30 |                                 |     |                                                                                                                                                                                                                                                                                                                     |
| 31 |                                 |     |                                                                                                                                                                                                                                                                                                                     |
| 32 | Declaration of interests        | 28  | Financial and other competing interests for principal investigators for the overall trial and each study site<br><b>Yes – page 21</b>                                                                                                                                                                               |
| 33 |                                 |     |                                                                                                                                                                                                                                                                                                                     |
| 34 |                                 |     |                                                                                                                                                                                                                                                                                                                     |
| 35 |                                 |     |                                                                                                                                                                                                                                                                                                                     |
| 36 | Access to data                  | 29  | Statement of who will have access to the final trial dataset, and disclosure of contractual agreements that limit such access for investigators<br><b>Yes – page 17</b>                                                                                                                                             |
| 37 |                                 |     |                                                                                                                                                                                                                                                                                                                     |
| 38 |                                 |     |                                                                                                                                                                                                                                                                                                                     |
| 39 |                                 |     |                                                                                                                                                                                                                                                                                                                     |
| 40 |                                 |     |                                                                                                                                                                                                                                                                                                                     |
| 41 |                                 |     |                                                                                                                                                                                                                                                                                                                     |
| 42 | Ancillary and post-trial care   | 30  | Provisions, if any, for ancillary and post-trial care, and for compensation to those who suffer harm from trial participation                                                                                                                                                                                       |
| 43 |                                 |     |                                                                                                                                                                                                                                                                                                                     |
| 44 |                                 |     |                                                                                                                                                                                                                                                                                                                     |
| 45 | Dissemination policy            | 31a | Plans for investigators and sponsor to communicate trial results to participants, healthcare professionals, the public, and other relevant groups (eg, via publication, reporting in results databases, or other data sharing arrangements), including any publication restrictions<br><b>Yes – pages 16 and 17</b> |
| 46 |                                 |     |                                                                                                                                                                                                                                                                                                                     |
| 47 |                                 |     |                                                                                                                                                                                                                                                                                                                     |
| 48 |                                 |     |                                                                                                                                                                                                                                                                                                                     |
| 49 |                                 |     |                                                                                                                                                                                                                                                                                                                     |
| 50 |                                 |     |                                                                                                                                                                                                                                                                                                                     |
| 51 |                                 |     |                                                                                                                                                                                                                                                                                                                     |
| 52 |                                 | 31b | Authorship eligibility guidelines and any intended use of professional writers<br><b>Not applicable</b>                                                                                                                                                                                                             |
| 53 |                                 |     |                                                                                                                                                                                                                                                                                                                     |
| 54 |                                 |     |                                                                                                                                                                                                                                                                                                                     |
| 55 |                                 |     |                                                                                                                                                                                                                                                                                                                     |
| 56 |                                 |     |                                                                                                                                                                                                                                                                                                                     |
| 57 |                                 | 31c | Plans, if any, for granting public access to the full protocol, participant-level dataset, and statistical code<br><b>Yes – page 17</b>                                                                                                                                                                             |
| 58 |                                 |     |                                                                                                                                                                                                                                                                                                                     |
| 59 |                                 |     |                                                                                                                                                                                                                                                                                                                     |
| 60 |                                 |     |                                                                                                                                                                                                                                                                                                                     |

## Appendices

|                                 |                            |    |                                                                                                                                                                                                                         |
|---------------------------------|----------------------------|----|-------------------------------------------------------------------------------------------------------------------------------------------------------------------------------------------------------------------------|
| 1<br>2<br>3<br>4<br>5<br>6<br>7 | Informed consent materials | 32 | Model consent form and other related documentation given to participants and authorised surrogates<br><b>Not applicable</b>                                                                                             |
| 8<br>9<br>10<br>11<br>12<br>13  | Biological specimens       | 33 | Plans for collection, laboratory evaluation, and storage of biological specimens for genetic or molecular analysis in the current trial and for future use in ancillary studies, if applicable<br><b>Not applicable</b> |

---

\*It is strongly recommended that this checklist be read in conjunction with the SPIRIT 2013 Explanation & Elaboration for important clarification on the items. Amendments to the protocol should be tracked and dated. The SPIRIT checklist is copyrighted by the SPIRIT Group under the Creative Commons "[Attribution-NonCommercial-NoDerivs 3.0 Unported](https://creativecommons.org/licenses/by-nc-nd/3.0/)" license.

# BMJ Open

## Development and Evaluation of a Patient-Centered Program for Low Anterior Resection Syndrome: Protocol for a Randomized Controlled Trial

|                                 |                                                                                                                                                                                                                                                                                                                                                                                                                                                                                                                                                                                                                                                                                                                                                                                                                                                                                                                                                                                             |
|---------------------------------|---------------------------------------------------------------------------------------------------------------------------------------------------------------------------------------------------------------------------------------------------------------------------------------------------------------------------------------------------------------------------------------------------------------------------------------------------------------------------------------------------------------------------------------------------------------------------------------------------------------------------------------------------------------------------------------------------------------------------------------------------------------------------------------------------------------------------------------------------------------------------------------------------------------------------------------------------------------------------------------------|
| Journal:                        | <i>BMJ Open</i>                                                                                                                                                                                                                                                                                                                                                                                                                                                                                                                                                                                                                                                                                                                                                                                                                                                                                                                                                                             |
| Manuscript ID                   | bmjopen-2019-035587.R1                                                                                                                                                                                                                                                                                                                                                                                                                                                                                                                                                                                                                                                                                                                                                                                                                                                                                                                                                                      |
| Article Type:                   | Protocol                                                                                                                                                                                                                                                                                                                                                                                                                                                                                                                                                                                                                                                                                                                                                                                                                                                                                                                                                                                    |
| Date Submitted by the Author:   | 27-Dec-2019                                                                                                                                                                                                                                                                                                                                                                                                                                                                                                                                                                                                                                                                                                                                                                                                                                                                                                                                                                                 |
| Complete List of Authors:       | Garfinkle, Richard; Jewish General Hospital, Division of Colon and Rectal Surgery<br>Loiselle, Carmen; McGill University, Department of Oncology<br>Park, Jason; University of Manitoba, Department of Surgery<br>Fiore Jr, Julio; McGill University, Department of Surgery<br>Bordeianou, Liliana; Massachusetts General Hospital, Section of Colon and Rectal Surgery<br>Lieberman, A.; McGill University Health Centre, Department of Surgery<br>Morin, Nancy; Jewish General Hospital, Division of Colon and Rectal Surgery<br>Faria, Julio; Jewish General Hospital, Division of Colon and Rectal Surgery<br>Ghitulescu, Gabriela; Jewish General Hospital, Division of Colon and Rectal Surgery<br>Vasilevsky, Carol-Ann; Jewish General Hospital, Division of Colon and Rectal Surgery<br>Bhatnagar, Sahir; McGill University, Department of Epidemiology, Biostatistics and Occupational Health<br>Boutros, Marylise; Jewish General Hospital, Division of Colon and Rectal Surgery |
| <b>Primary Subject Heading</b>: | Surgery                                                                                                                                                                                                                                                                                                                                                                                                                                                                                                                                                                                                                                                                                                                                                                                                                                                                                                                                                                                     |
| Secondary Subject Heading:      | Oncology, Gastroenterology and hepatology                                                                                                                                                                                                                                                                                                                                                                                                                                                                                                                                                                                                                                                                                                                                                                                                                                                                                                                                                   |
| Keywords:                       | Colorectal surgery < SURGERY, Gastrointestinal tumours < ONCOLOGY, Epidemiology < ONCOLOGY, Adult gastroenterology < GASTROENTEROLOGY                                                                                                                                                                                                                                                                                                                                                                                                                                                                                                                                                                                                                                                                                                                                                                                                                                                       |
|                                 |                                                                                                                                                                                                                                                                                                                                                                                                                                                                                                                                                                                                                                                                                                                                                                                                                                                                                                                                                                                             |

SCHOLARONE™  
Manuscripts

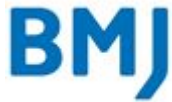

I, the Submitting Author has the right to grant and does grant on behalf of all authors of the Work (as defined in the below author licence), an exclusive licence and/or a non-exclusive licence for contributions from authors who are: i) UK Crown employees; ii) where BMJ has agreed a CC-BY licence shall apply, and/or iii) in accordance with the terms applicable for US Federal Government officers or employees acting as part of their official duties; on a worldwide, perpetual, irrevocable, royalty-free basis to BMJ Publishing Group Ltd ("BMJ") its licensees and where the relevant Journal is co-owned by BMJ to the co-owners of the Journal, to publish the Work in this journal and any other BMJ products and to exploit all rights, as set out in our [licence](#).

The Submitting Author accepts and understands that any supply made under these terms is made by BMJ to the Submitting Author unless you are acting as an employee on behalf of your employer or a postgraduate student of an affiliated institution which is paying any applicable article publishing charge ("APC") for Open Access articles. Where the Submitting Author wishes to make the Work available on an Open Access basis (and intends to pay the relevant APC), the terms of reuse of such Open Access shall be governed by a Creative Commons licence – details of these licences and which [Creative Commons](#) licence will apply to this Work are set out in our licence referred to above.

Other than as permitted in any relevant BMJ Author's Self Archiving Policies, I confirm this Work has not been accepted for publication elsewhere, is not being considered for publication elsewhere and does not duplicate material already published. I confirm all authors consent to publication of this Work and authorise the granting of this licence.



## Development and Evaluation of a Patient-Centered Program for Low Anterior Resection Syndrome: Protocol for a Randomized Controlled Trial

Richard Garfinkle, MD<sup>1</sup>; Carmen G. Loiselle, PhD<sup>2</sup>; Jason Park, MD<sup>3</sup>; Julio Fiore Jr, PhD<sup>4</sup>; Liliana G. Bordeianou, MD<sup>5</sup>; A. Sender Liberman, MD<sup>4</sup>; Nancy Morin, MD<sup>1</sup>; Julio Faria, MD<sup>1</sup>; Gabriela Ghitulescu, MD<sup>1</sup>; Carol-Ann Vasilevsky, MD<sup>1</sup>; Sahir R. Bhatnagar<sup>6</sup>, PhD; Marylise Boutros, MD<sup>1</sup>

1. Division of Colon and Rectal Surgery, Jewish General Hospital, Montreal, QC, Canada
2. Department of Oncology and Ingram School of Nursing, McGill University, Montreal, QC, Canada
3. Department of Surgery, University of Manitoba, Winnipeg, MB, Canada
4. Department of Surgery, McGill University, Montreal, QC, Canada
5. Section of Colon and Rectal Surgery, Massachusetts General Hospital, Boston, MA, USA
6. Department of Epidemiology, Biostatistics and Occupational Health, McGill University, Montreal, QC, Canada

### Correspondence:

Marylise Boutros, MDCM, FRCSC  
Associate Professor of Surgery, McGill University  
Jewish General Hospital  
3755 Cote Ste Catherine, G-317  
Montreal, Quebec  
H3T 1E2  
(Tel) 514-340-8222 x 28400  
(Fax) 514-340-7560  
Email: [maryliseboutros@gmail.com](mailto:maryliseboutros@gmail.com)

## ABSTRACT

**Introduction:** Low Anterior Resection Syndrome (LARS) is described as disordered bowel function after rectal resection that leads to a detriment in quality of life, and affects the majority of individuals following restorative proctectomy for rectal cancer. The management of LARS includes personalized troubleshooting and effective self-management behaviors. Thus, affected individuals need to be well informed and appropriately engaged in their own LARS management. This manuscript describes the development of a LARS Patient-Centered Program (LPCP) and the study protocol for its evaluation in a randomized controlled trial.

**Methods and Analysis:** This will be a multicenter, randomized, assessor-blind, parallel-groups, pragmatic trial evaluating the impact of a LPCP, consisting of an informational booklet, patient diaries, and nurse support, on patient-reported outcomes after restorative proctectomy for rectal cancer. The informational booklet was developed by a multidisciplinary LARS team, and was vetted in a focus group and semi-structured interviews involving patients, caregivers, and healthcare professionals. The primary outcome will be global quality of life (QoL), as measured by the European Organization for Research and Treatment of Cancer Quality of Life Questionnaire – Core 30 (QLQ-C30), at 6 months after surgery. The treatment effect on global QOL will be modeled using generalized estimating equations. Secondary outcomes include patient activation, bowel function measures, emotional distress, knowledge about LARS, and satisfaction with the LPCP.

**Ethics and Dissemination:** The Research Ethics Committee (REC) at the Integrated Health and Social Services Network (CIUSSS) for West-Central Montreal (health network responsible for the Jewish General Hospital) is the overseeing REC for all Quebec sites. They have granted ethical approval (MP-05-2019-1628) for all Quebec hospitals (Jewish General Hospital, McGill

1  
2  
3 University Health Center, CHU de Quebec) and have granted full authorization to begin research  
4  
5 at the Jewish General Hospital. Patient recruitment will not begin at the other Quebec sites until  
6  
7 inter-institutional contracts are finalized and feasibility / authorization for research is granted by  
8  
9 their respective REC. The results of this study will be presented at national and international  
10  
11 conferences, and a manuscript with results will be submitted for publication in a high-impact  
12  
13 peer-reviewed journal.  
14  
15

16  
17 **Registration:** This trial was registered on clinicaltrials.gov on February 4, 2019 (no:  
18  
19 NCT03828318).  
20  
21  
22  
23  
24  
25  
26  
27  
28  
29  
30  
31  
32  
33  
34  
35  
36  
37  
38  
39  
40  
41  
42  
43  
44  
45  
46  
47  
48  
49  
50  
51  
52  
53  
54  
55  
56  
57  
58  
59  
60

### Strengths and Limitations of the Study

- This will be the first randomized controlled trial evaluating a supportive intervention for patients with Low Anterior Resection Syndrome
- This study will collect longitudinal data on patient-reported outcomes following restorative proctectomy, and will report on the natural evolution of several important outcome measures over the first postoperative year
- The informational booklet used in the trial underwent a rigorous pre-trial assessment and was revised into its final format based on feedback obtained in focus groups involving patients, caregivers, and healthcare professionals
- As with any longitudinal study, there is a risk for attrition throughout the study period, which could be a source of bias in the final results
- Management in the standard care group will vary by institution; however, none of the participating institutions have a formal LARS program for rectal cancer survivors

## INTRODUCTION

Restorative proctectomy is increasingly performed for rectal cancer as surgeons continue to push the limits of sphincter preservation.<sup>1,2</sup> However, despite avoiding a permanent ostomy, many individuals are left with significant bowel dysfunction after sphincter-sparing surgery. Low Anterior Resection Syndrome (LARS) encompasses a series of negative bowel symptoms, such as frequency, urgency, incontinence, and clustering of bowel movements,<sup>3</sup> that can affect 70 to 90% of patients following restorative proctectomy.<sup>4,5</sup> Although symptoms may improve somewhat in the first year or two after surgery, long-term bowel dysfunction often remains in more than 70% of patients and major dysfunction in over 50%.<sup>6-8</sup> As such, LARS remains a significant concern for rectal cancer survivors and their significant others, as increased severity correlates with worse perceived global health status and quality of life (QoL).<sup>5,8,9</sup>

Currently, there is no well-established treatment strategy for LARS, and management is both empirical and symptom-based.<sup>4</sup> LARS is usually managed with a combination of lifestyle, pharmacological, and at times, interventional strategies, with mixed success. Due to the individual nature of each patient's cluster of symptoms, much of the care requires personalized troubleshooting and self-management behaviors to improve bowel symptoms and QoL.<sup>4</sup> These behaviors include understanding one's own symptoms, knowing how to use and dose stool bulking agents and anti-diarrheal medications, performing pelvic floor exercises, adhering to dietary recommendations, proper perianal skin management, and preparing ahead of social engagements. Thus, individuals need to be well informed, motivated and engaged in their own LARS management to take more control over their bowel function and achieve optimal outcomes.

1  
2  
3           Among individuals undergoing rectal resection with a permanent ostomy (e.g.,  
4  
5 abdominoperineal resection), there is evidence that supportive and informational interventions  
6  
7 improve QoL, ostomy proficiency, self-efficacy and knowledge.<sup>10-12</sup> However, evidence  
8  
9 regarding the impact of such interventions in patients who undergo restorative proctectomy is  
10  
11 lacking, despite the latter operation being far more frequently performed.<sup>1</sup> When provided with  
12  
13 the means to better understand and control important aspects of their bowel function, patients  
14  
15 may be more likely to experience positive improvements in self-reported outcomes. In a recent  
16  
17 review comparing long-term patient-reported outcomes after ostomy or sphincter-sparing surgery  
18  
19 for low rectal cancer, the authors concluded that interventions geared towards patients without  
20  
21 ostomies warrant further attention.<sup>13</sup>  
22  
23  
24  
25

26           This paper describes a study protocol for a randomized controlled trial (RCT)  
27  
28 investigating the impact of a LARS Patient-Centered Program (LPCP) on patient-reported  
29  
30 outcomes after restorative proctectomy for rectal cancer. Furthermore, qualitative data are  
31  
32 presented that were gathered through a focus group assembling individuals with LARS and their  
33  
34 caregivers, and through semi-structured interviews with rectal cancer healthcare professionals, as  
35  
36 a joint effort to develop the LPCP.  
37  
38  
39  
40  
41

## 42 **METHODS AND ANALYSIS**

### 43 **Phase 1: Study Protocol for Proposed RCT**

44  
45           The study protocol was written in accordance with the Standard Protocol Items:  
46  
47 Recommendations for Interventional Trials (SPIRIT) statement.<sup>14</sup>  
48  
49

#### 50 Objectives

1  
2  
3 The overall objective of this study is to evaluate the effects of a LPCP on patient-reported  
4 outcome measures (PROMs) after restorative proctectomy for rectal cancer. Specifically, our  
5 primary objective is to evaluate the extent to which a LPCP improves global QoL, as measured  
6 by the European Organization for Research and Treatment of Cancer (EORTC) Quality of Life  
7 Questionnaire – Core 30 (QLQ-C30), at 6 months after surgery in comparison to standard care.  
8 Secondary objectives include the effects of a LPCP on symptom change, patient activation,  
9 bowel function, emotional distress, patient knowledge, and satisfaction with LARS care.

### 19 Participants and Setting

21 This multicenter RCT involves participants from multiple institutions across North  
22 America with high-volume Colorectal Surgery or Surgical Oncology practices. Patients who  
23 have undergone restorative proctectomy for neoplastic disease (benign or malignant) located in  
24 the rectum (0-15cm from the anal verge) with a diverting ostomy and who are scheduled for  
25 ostomy closure are eligible for inclusion. Patients will be recruited approximately one month  
26 prior to ostomy closure by their individual surgeon, who will go through the informed consent  
27 process with them. Exclusion criteria include: 1) active chemotherapy or radiotherapy treatment  
28 at the time of consent; 2) major colonic resection in addition to proctectomy; 3) inability to be  
29 contacted by telephone; 4) inability to read and comprehend English or French; and 5) inability  
30 to provide clear and informed consent. The study is estimated to be open from November 2019  
31 to November 2022.

### 47 Randomization

49 Consecutive participants will be randomized in a 1:1 ratio into one of two groups: 1)  
50 LARS Patient-Centered Program; or 2) Standard Care. Block randomization with randomly  
51 varying block sizes will be performed to ensure an equal number of participants in each group.

1  
2  
3 Randomization will also be stratified by participating institution. An online centralized  
4  
5 computer-generated randomization sequence will be used to ensure allocation concealment.  
6

### 7 LARS Patient-Centered Program

8  
9  
10 The LPCP consists of an informational booklet, patient diaries, and nursing support made  
11  
12 available only to patients randomized to the intervention group.  
13

#### 14 1. Informational Booklet and Patient Diaries:

15  
16  
17 The goals of the booklet are to inform individuals with rectal cancer about postoperative  
18  
19 bowel dysfunction, manage expectations, and review the different treatment strategies. Prior to  
20  
21 developing the booklet, our team conducted a systematic review of online health information for  
22  
23 LARS to assess the readability, suitability, quality, accuracy and content of materials currently  
24  
25 available to patients.<sup>15</sup> We concluded that the current body of health information for patients  
26  
27 with LARS is suboptimal. In particular, no patient material was written at the American Medical  
28  
29 Association-recommended 6<sup>th</sup> grade reading level, there was little use of headings, summaries  
30  
31 and illustrations to accompany the text, and important content was missing. We then set out to  
32  
33 develop our own informational booklet, drawing on the important elements emphasized in each  
34  
35 assessment tool used in the systematic review. After developing the first draft of the booklet,  
36  
37 patients, caregivers, and healthcare professionals provided feedback to improve the booklet into  
38  
39 its current format. The booklet was then translated into French and underwent a similar  
40  
41 evaluation process. A more thorough description of the booklet's development process can be  
42  
43 found below (see Phase 2 below).  
44  
45  
46  
47  
48

49 The booklet will be introduced to patients at the time of study recruitment (before ostomy  
50  
51 closure). Participants will be instructed to read through the booklet at least once prior to their  
52  
53 ostomy closure operation and will be encouraged to consult it as much as needed thereafter. In  
54  
55  
56  
57  
58  
59  
60



1  
2  
3 addition to the informational booklet, participants will receive Bowel Symptom, Diet, and  
4  
5 Loperamide diaries and will be instructed to use them whenever experiencing any symptoms of  
6  
7 bowel dysfunction, and for 2 weeks prior to each scheduled nurse phone call (please see the next  
8  
9 section below). The goal of these diaries is to assist participants in recognizing the underlying  
10  
11 patterns related to their symptoms so that they can optimize their self-management.  
12  
13

## 14 15 2. Nursing Support:

16  
17 Nursing support will be centralized from one institution and made available to  
18  
19 participants in the intervention group, by telephone and email. The study nurse (bilingual in  
20  
21 English and French) has expertise in rectal cancer management and postoperative bowel  
22  
23 dysfunction. She will briefly review the booklet content with participants by telephone at the  
24  
25 beginning of the study (prior to ostomy closure) and answer related questions. Postoperatively,  
26  
27 the nurse will have scheduled telephone calls with participants at 1-, 3-, 6-, 9-, and 12-months, to  
28  
29 provide support and periodically review their completed diaries for troubleshooting. Lastly, she  
30  
31 will be available to speak with participants in between scheduled calls, either by phone or by  
32  
33 email.  
34  
35  
36

## 37 38 Standard Care Group

39  
40 Participants randomized to the standard care group will not have access to either the  
41  
42 informational booklet nor nursing support. Instead, they will only receive a paper copy (and/or  
43  
44 instructions for online access) of the Colorectal Cancer Association of Canada (CCAC) module  
45  
46 on “Living with Colorectal Cancer”. The standard care group will also receive the usual care for  
47  
48 LARS information and counseling that is routinely made available at their hospital, with  
49  
50 participating hospitals asked to provide a description of what constitutes “standard care” for  
51  
52 LARS. Due to the expected heterogeneity in institutional LARS practices, participating  
53  
54  
55  
56  
57  
58  
59  
60

1  
2  
3 institutions will be accounted for in the final statistical model in addition to stratified  
4  
5 randomization by institution. Participants in the standard care group will be told that they can  
6  
7 have access to the informational booklet when the study is complete.  
8  
9

### 10 Data Collection

11  
12 Baseline demographics, medical comorbidities, and disease and treatment characteristics  
13  
14 will be obtained from chart review, including known predictors of bowel dysfunction (e.g.,  
15  
16 tumor height, neoadjuvant radiotherapy, type of proctectomy [total vs. partial mesorectal  
17  
18 excision], reconstruction technique [straight anastomosis vs. neorectal reservoir], and  
19  
20 anastomotic leak after proctectomy). The remaining data will be gathered from self-reported  
21  
22 questionnaires at study time-points throughout the 12-month study period.  
23  
24  
25

### 26 Outcomes

27  
28  
29 Outcomes will be measured with the use of various PROMs and recorded into an online  
30  
31 registry (REDCap) by a blinded assessor. PROMs captured at the same time-point will be  
32  
33 completed as a single package. The schedule for all PROMs can be found in Table 1. The PROM  
34  
35 package for each time-point (available in both English and French) will either be mailed to  
36  
37 participants, disseminated via email, or completed over the phone, depending on participants'  
38  
39 preferences. Participants will receive email and telephone reminders for incomplete  
40  
41 questionnaires. The study timeline for both groups can be found in Figures 1 and 2. The  
42  
43 following outcomes and PROMs will be collected:  
44  
45  
46

#### 47 48 1. Quality of Life:

49  
50  
51 QoL will be measured using the EORTC-QLQ-C30, a self-report questionnaire  
52  
53 developed to assess QoL for patients living with or beyond cancer. It consists of 30 items, which  
54  
55 aggregate into 1 global QoL scale, 5 functional scales, 3 symptom scales, and 6 single items. The  
56  
57  
58  
59  
60

1  
2  
3 EORTC-QLQ-C30 has been well validated in individuals with rectal cancer and correlates  
4  
5 significantly with LARS severity.<sup>5,8,9</sup>  
6  
7

## 8 2. Symptom Changes: 9

10 The Measure Your Medical Outcome Profile (MYMOP2) is a patient-centered measure  
11 that assesses changes over time in a specific symptom identified as most bothersome to the  
12 patient.<sup>16,17</sup> The patient also identifies a daily activity that is being restricted or prevented by the  
13 symptom. Both the symptom and the activity are scored using a 6-point Likert-type scale in the  
14 last week.  
15  
16  
17  
18  
19  
20  
21  
22

## 23 3. Patient Activation: 24

25 Patient activation measures the degree of knowledge, skills, and confidence for self-  
26 management of healthcare.<sup>18</sup> In patients with chronic medical conditions, patient activation is  
27 associated with increased adherence to medication and decreased healthcare resource  
28 utilization.<sup>19</sup> We believe that the LPCP may increase patient activation, which may ultimately  
29 translate into increased patient engagement in their LARS healthcare.  
30  
31  
32  
33  
34  
35  
36  
37

38 The Patient Activation Measure-13 (PAM-13) is a 13-item questionnaire. Responses are  
39 based on a Likert scale ranging from “disagree strongly” to “agree strongly”, and the final score  
40 is a transformation ranging from 0 to 100 according to a conversion formula provided by the  
41 developers. Activation is then categorized into 1 of 4 groups based on their transformed score:  
42 Level 1, “overwhelmed and not ready to take an active role” ( $\leq 47.0$ ); Level 2, “realize they have  
43 a role to play, but lack the knowledge and confidence” (47.1-55.1); Level 3, “beginning to take  
44 action, but still lack confidence” (55.2-72.4); Level 4, “can manage their healthcare, but may  
45 struggle to maintain the behaviors” ( $\geq 72.5$ ).  
46  
47  
48  
49  
50  
51  
52  
53  
54  
55  
56  
57  
58  
59  
60

#### 4. Bowel Function:

Bowel function will be measured postoperatively using three validated tools/questions.

The LARS Score is a 5-item tool aimed at symptoms of bowel dysfunction, with each question weighted differently according to the perceived importance by patients. The scores of the 5 questions sum to 42 points. The LARS Score allows the categorization of patients as having major (30-42 points), minor (21-29 points), or no LARS (0-20 points). The Cleveland Clinic Florida / Wexner Fecal Incontinence Score (WFIS) is a 5-item tool aimed at measuring the frequency of incontinence to gas and liquid or solid stools, and its consequences (pad wearing and lifestyle alterations). Each question ranges from 0 (never) to 4 (always) and the total score is measured out of 20. Lastly, each participant will be asked a single, validated, bowel-related QoL question: "Overall, how much does your bowel function affect your quality of life?" Responses categorize respondents into 1 of 3 grades: "not at all" (no impairment); "very little" (minor impairment); "somewhat" or "a lot" (major impairment). Bowel-related QoL is significantly correlated with both the LARS Score and general QoL as per previous studies.<sup>9</sup>

#### 5. Emotional Distress:

Many patients with LARS describe emotional distress, anxiety, and isolation (see Phase 2 below). The LPCP is designed to alleviate some of the distress associated with LARS, and may provide hope that symptoms can be optimally managed.

Emotional distress will be measured using the Hospital Anxiety and Depression Scale (HADS), which has been validated in colorectal cancer survivors.<sup>20,21</sup> It includes 7 items aimed at assessing depression and 7 items for anxiety. Each item is scored 0-3, and is based on frequency of symptoms. The total score is out of 21, and individuals can be categorized as "normal" (0-7), "borderline abnormal" (8-10), or "abnormal" i.e., depressed or anxious (11-21).

1  
2  
3 6. Knowledge:  
4

5 Given that the LPCP is partly an informational intervention, knowledge related to LARS  
6 will be measured using a short, investigator-generated, multiple-choice questionnaire. The items  
7 reflect key concepts in etiology/risk factors and management of LARS. We believe that  
8 improving LARS knowledge will further improve patient activation and engagement in LARS  
9 healthcare, which may lead to improvements in QoL and possibly bowel function.  
10  
11  
12  
13  
14  
15

16  
17 7. Satisfaction:  
18

19 Satisfaction related to LARS care received throughout the study period (information and  
20 support) will be assessed in both groups using a short, investigator-generated, 2-item  
21 questionnaire. Responses will be recorded using a 5-point Likert scale, ranging from “not  
22 satisfied” (1) to “very satisfied” (5).  
23  
24  
25  
26  
27

28 Statistical Analysis  
29

30  
31 Descriptive analyses will include means with standard deviations, medians with ranges,  
32 or frequencies with proportions, where appropriate. Continuous outcomes will be compared  
33 using a t-test or Wilcoxon rank-sum test and categorical outcomes using  $\chi^2$  tests. The treatment  
34 effect on global QoL and bowel function will be modeled using generalized estimating equations  
35 (GEE).<sup>22</sup> This method accounts for 1) the within-subject correlation between responses at  
36 different time-points, and 2) possible clustering of responses among patients from the same  
37 hospital. GEE models also make use of all the available data, so that patients can contribute to  
38 the model if they have data available for any single time-point. An appropriate correlation  
39 structure will be chosen using the quasi-likelihood information criterion. The effect size,  
40 standard error, and 95% confidence interval for the estimate of the treatment effect at 6 months  
41  
42  
43  
44  
45  
46  
47  
48  
49  
50  
51  
52  
53  
54  
55  
56  
57  
58  
59  
60

1  
2  
3 will be reported. For the remaining secondary outcomes, pairwise comparisons will be performed  
4  
5 at various time-points.  
6

### 7 Power Analysis and Sample Size Calculations

8  
9  
10 The primary outcome of the study is global QoL at 6 months, as measured by the EORTC  
11  
12 QLQ-C30. Based on the largest available cohort of patients with QoL data who have undergone  
13  
14 restorative proctectomy for rectal cancer and who are ostomy-free, mean global QoL score is  
15  
16 assumed to be 77 (maximum possible score is 100) with a standard deviation of 19.<sup>9</sup> According  
17  
18 to the consensus guidelines on the use of the EORTC QLQ-C30 to power a randomized  
19  
20 controlled trial, a mean difference in global QoL of 10 points (small-medium treatment effect) is  
21  
22 the most appropriate expected effect-size for interventions aimed to improve QoL in cancer  
23  
24 patients.<sup>23</sup> Thus, with an alpha=0.05 and power=0.80, we estimate that 45 participants are  
25  
26 required in each arm of our study. Given the risk for attrition over the 6-month study period, the  
27  
28 adjusted final sample size accounting for a 30% attrition rate is 64 participants in each arm (128  
29  
30 patients in total).  
31  
32  
33

### 34 Registration

35  
36 This trial was registered on clinicaltrials.gov on February 4, 2019 (no: NCT03828318).  
37  
38  
39  
40  
41

### 42 **Phase 2: Development of Informational Booklet**

43  
44 The first draft of the informational booklet was developed by a multidisciplinary team of  
45  
46 healthcare professionals who care for patients with rectal cancer. The initiative was co-led by a  
47  
48 General Surgery resident (R.G.) and a Colorectal Surgery attending (M.B.), and included a senior  
49  
50 colorectal cancer oncology pivot nurse, pelvic physiotherapist, and members of the McGill  
51  
52 University Patient Education Office. The booklet was designed to review important information  
53  
54  
55  
56  
57  
58  
59  
60

1  
2  
3 regarding the epidemiology, symptomatology, and management of LARS. The booklet was  
4  
5 written at a 6<sup>th</sup>-grade reading level, which is recommended by the American Medical Association  
6  
7 for any patient material,<sup>24</sup> and included original illustrations designed by our team.  
8  
9

10 An Institutional Review Board-approved qualitative study was subsequently undertaken  
11  
12 to evaluate the booklet. A single focus group with rectal cancer patients and their caregivers, as  
13  
14 well as individual semi-structured telephone interviews with healthcare professionals, were  
15  
16 conducted.  
17  
18

19 Participants for the focus group were recruited from individual Colorectal Surgeons  
20  
21 practicing at a single institution. The focus group included 12 participants (six patients and their  
22  
23 caregivers/partners) and followed a semi-structured interview guide (Supplementary File 1).  
24  
25 Each patient was a minimum of 6-months removed from ileostomy closure (if diverted) or  
26  
27 proctectomy. Participants' characteristics are reported in Table 2. Each participant/caregiver was  
28  
29 given two copies of the informational booklet and allowed three weeks to review the booklet and  
30  
31 generate their own thoughts. The purpose of the focus group was to obtain feedback regarding  
32  
33 the first draft of the booklet, to better understand participants' current/past experiences with  
34  
35 LARS, and to incorporate changes into the booklet to meet the informational needs of rectal  
36  
37 cancer survivors. The focus group was audio-recorded and transcribed, and data were analyzed  
38  
39 using the grounded theory.<sup>25,26</sup> The constant comparative method was applied; data from  
40  
41 participants were coded based on emerging patterns, concepts, and themes to generate theory,  
42  
43 which was then analyzed and categorized accordingly so that descriptive statements could be  
44  
45 formed.<sup>27</sup> The principal findings from the thematic analysis of the focus group are displayed in  
46  
47 Table 3. Patients and their caregivers described the emotional difficulties of living with LARS  
48  
49 and the general lack of support and preparation they received from their healthcare team. They  
50  
51  
52  
53  
54  
55  
56  
57  
58  
59  
60

1  
2  
3 unanimously supported the development and dissemination of the booklet, reporting that it  
4 would have had a major impact on their outlook and knowledge regarding LARS in their first  
5 year after surgery. Some of the feedback included more emphasis to be placed on expectation  
6 management and emotional support, and they asked for more detail regarding enema use. They  
7 also requested a list of healthcare providers who could support them in their LARS care, and  
8 more examples for foods which may activate their LARS.  
9  
10  
11  
12  
13  
14  
15

16  
17 Healthcare professionals from multiple institutions across North America were invited to  
18 review the booklet as well. In total, 10 healthcare professionals comprised of seven Colorectal  
19 Surgeons and three nurses in Gastrointestinal Oncology, and each was interviewed using a semi-  
20 structured interview guide (Supplementary File 2). Characteristics of the healthcare professionals  
21 are reported in Table 4. Similar to patient participants, each healthcare professional was given  
22 one copy of the informational booklet and allowed three weeks to review the booklet and  
23 generate their own thoughts. The focus of these interviews was largely on content and  
24 management strategies; to ensure that our booklet would be as comprehensive and inclusive as  
25 possible. Furthermore, healthcare professionals were asked about the layout and structure,  
26 clinical applicability, and other means of improving the booklet. Similar to the focus group, the  
27 interviews were recorded, and the same methods were used for data analysis. The principal  
28 findings from the interviews are displayed in Table 5. Healthcare professionals felt that the  
29 booklet was accurate and comprehensive, and that it would complement the role of a  
30 clinician/nurse in supporting patients with LARS. Several interviewees recommended additional  
31 medications and illustrations, but did not feel the layout or structure needed to be further revised.  
32 Small changes in language were recommended as well (e.g., “stoma” instead of “bag” – most  
33 healthcare professionals felt that patients understand the meaning of stoma).  
34  
35  
36  
37  
38  
39  
40  
41  
42  
43  
44  
45  
46  
47  
48  
49  
50  
51  
52  
53  
54  
55  
56  
57  
58  
59  
60



1  
2  
3 Based on the results of this qualitative study, the informational booklet was modified into  
4 its final format. The booklet was then professionally translated into French language, and  
5  
6  
7  
8 underwent a similar evaluation process with French-speaking patient volunteers.  
9

## 10 11 12 **Patient and Public Involvement** 13

14  
15 Patients were involved in the development of the informational booklet to be used as part  
16 of the LPCP. Patients and the public were not involved in the design of the study; however, the  
17  
18  
19 outcomes proposed in this study are specifically designed to assess participants' experience with  
20  
21  
22 LARS and the LPCP. The authors would also like to thank Dr.'s Steven D. Wexner, Patricia  
23  
24 Sylla, Mitchell Bernstein, as well as Holly Bonnette and Tracy Chornopyski, for their  
25  
26  
27 contributions.  
28  
29  
30

## 31 **Ethics and Dissemination** 32

33  
34 The Research Ethics Committee (REC) at the Integrated Health and Social Services  
35  
36 Network (CIUSSS) for West-Central Montreal (health network responsible for the Jewish  
37  
38 General Hospital) is the overseeing REC for all Quebec sites. They have granted ethical approval  
39  
40 (MP-05-2019-1628) for all Quebec hospitals (Jewish General Hospital, McGill University  
41  
42 Health Center, CHU de Quebec) and have granted full authorization to begin research at the  
43  
44  
45 Jewish General Hospital. Patient recruitment will not begin at the other Quebec sites until inter-  
46  
47  
48 institutional contracts are finalized and feasibility / authorization for research is granted by their  
49  
50  
51 respective REC. The English-language patient consent is presented as Supplementary File 3.

52  
53 The results of this study will be presented at national and international meetings, and a  
54  
55  
56 manuscript will be submitted for publication in a high-impact peer-reviewed journal. We  
57  
58  
59

1  
2  
3 anticipate that the findings will inform the development of future rectal cancer survivorship  
4  
5 programs with a focus on bowel dysfunction, in an effort to improve the long-term QoL of  
6  
7 individuals with rectal cancer.  
8  
9  
10  
11

### 12 **Data Sharing Statement**

13  
14 Individual patient data from this trial will not be shared.  
15  
16  
17  
18  
19  
20  
21  
22  
23  
24  
25  
26  
27  
28  
29  
30  
31  
32  
33  
34  
35  
36  
37  
38  
39  
40  
41  
42  
43  
44  
45  
46  
47  
48  
49  
50  
51  
52  
53  
54  
55  
56  
57  
58  
59  
60

## References

1. Ricciardi R, Virnig BA, Madoff RD, et al. The status of radical proctectomy and sphincter-sparing surgery in the United States. *Dis Colon Rectum* 2007;50:1119-1127.
2. Tilney HS, Heriot AG, Purkayastha S, et al. A national perspective on the decline of abdominoperineal resection for rectal cancer. *Ann Surg* 2008;247:77-84.
3. Emmertsen KJ, Laurberg S. Low anterior resection syndrome score: development and validation of a symptom-based scoring system for bowel dysfunction after low anterior resection for rectal cancer. *Ann Surg* 2012;255:922-928.
4. Bryant CL, Lunniss PJ, Knowles CH, et al. Anterior resection syndrome. *Lancet Oncol* 2012;13:e403-408.
5. Emmertsen KJ, Laurbeg S; Rectal Cancer Function Study Group. Impact of bowel dysfunction on quality of life after sphincter-preserving resection for rectal cancer. *Br J Surg* 2013;100:1377-1387.
6. Battersby NJ, Bouliotis G, Emmertsen KJ, et al. Development and external validation of a nomogram and online tool to predict bowel dysfunction following restorative rectal cancer resection: the POLARS score. *Gut* 2018;67:688-696.
7. Chen TY, Wiltink LM, Nout RA, et al. Bowel function 14 years after preoperative short-course radiotherapy and total mesorectal excision for rectal cancer: report of a multicenter randomized trial. *Clin Colorectal Cancer* 2015;14:106-114.
8. Juul T, Ahlberg M, Biondo S, et al. Low anterior resection syndrome and quality of life: an international multicenter study. *Dis Colon Rectum* 2014;57:585-591.

- 1  
2  
3 9. Battersby NJ, Juul T, Christensen P, et al. Predicting the risk of bowel-related quality-of-  
4  
5 life impairment after restorative resection for rectal cancer: a multicenter cross-sectional  
6  
7 study. *Dis Colon Rectum* 2016;59:270-280.  
8  
9
- 10 10. Faury S, Koleck M, Foucaud J, et al. Patient education interventions for colorectal cancer  
11  
12 patients with stoma: a systematic review. *Patient Educ Couns* 2017;100:1807-1819.  
13
- 14 11. Phatak UR, Li LT, Karanjawala B, et al. Systematic review of educational interventions  
15  
16 for ostomates. *Dis Colon Rectum* 2014;57:529-537.  
17  
18
- 19 12. Krouse RS, Grant M, McCorkle R, et al. A chronic care ostomy self-management  
20  
21 program for cancer survivors. *Psychooncology* 2016;25:574-581.  
22  
23
- 24 13. Herrinton LJ, Altschuler A, McMullen CK, et al. Conversations for providers caring for  
25  
26 patients with rectal cancer: comparison of long-term patient-centered outcomes for  
27  
28 patients with low rectal cancer facing ostomy or sphincter-sparing surgery. *Ca Cancer J*  
29  
30 *Clin* 2016;66:387-397.  
31  
32
- 33 14. Chan AW, Tetzlaff JM, Altman DG, et al. SPIRIT 2013 statement: defining standard  
34  
35 protocol items for clinical trials. *Ann Intern Med* 2013;158:200-207.  
36  
37
- 38 15. Garfinkle R, Wong-Chong N, Petrucci A, et al. Assessing the readability, quality and  
39  
40 accuracy of online health information for patients with Low Anterior Resection  
41  
42 Syndrome following surgery for rectal cancer. *Colorectal Dis* 2019;21:523-31.  
43  
44
- 45 16. Paterson C. Measuring outcomes in primary care: a patient generated measure,  
46  
47 MYMOP2, compared with SF-36 health survey. *BMJ* 1996;312:1016-1020.  
48
- 49 17. Paterson C, Britten N. In pursuit of patient-centered outcomes: a qualitative evaluation of  
50  
51 MYMOP2, measure yourself medical outcome profile. *J Health Serv Res Policy*  
52  
53 2000;5:27-36.  
54  
55  
56  
57  
58  
59  
60

18. Hibbard JH, Mahoney ER, Stockard J, et al. Development and testing of a short form of the patient activation measure. *Health Serv Res* 2005;40:1918-1930.
19. Kinney RL, Lemon SC, Person SD, et al. The association between patient activation and medication adherence, hospitalization, and emergency room utilization inpatients with chronic illnesses: a systematic review. *Patient Educ Couns*. 2015;98:545-52.
20. Aminisani N, Nikbakht H, Jafarabadi MA, et al. Depression, anxiety, and health related quality of life among colorectal cancer survivors. *J Gastrointest Oncol* 2017;8:81-88.
21. Tsunoda A, Nakao K, Hiratsuka K, et al. Anxiety, depression and quality of life in colorectal cancer patients. *Int J Clin Oncol* 2005;10:411-417.
22. Liang K and Zeger SL. Longitudinal data analysis using generalized linear models. *Biometrika* 1986;73:13-22.
23. Cocks K, King MT, Velikova G, et al. Evidence-based guidelines for determination of sample size and interpretation of the European Organisation of the Research and Treatment of Cancer quality of life questionnaire core 30. *J Clin Oncol* 2001;29:89-96.
24. Weiss B. *Health literacy and patient safety: help patients understand*. 2<sup>nd</sup> ed. Chicago, IL: American Medical Association Foundation / American Medical Association; 2007.
25. Morse JM, Field PA. *Nursing research: the application of qualitative research*. 2<sup>nd</sup> ed. United Kingdom: Nelson Thornes; 1996.
26. Rabiee F. Focus-group interview and data analysis. *Proc Nutr Soc* 2004;63:655-60.
27. Taylor SJ, Bogdan R. *Introduction to qualitative research methods: a guidebook and resource*. 3<sup>rd</sup> ed. New York: Wiley; 1998.

### Author Contributions

RG, CGL, JP, JFJ, LGB, ASL, NM, JF, GG, CAV, SRB, and MB contributed to the design of the study. RG, CGL, JP, LGB, ASL, NM, JF, GG, CAV, and MB participated in qualitative data acquisition. RG, CGL, JFJ, SRB, and MB contributed to the data analysis plan. RG, JP, LGB, ASL, NM, JF, GG, CAV, and MB were involved in obtaining ethical approval. RG and MB prepared the first draft of the manuscript. RG, CGL, JP, JFJ, LGB, ASL, NM, JF, GG, CAV, SRB, and MB contributed to, and approved, the final version of the manuscript.

### Funding

This work is supported by a McGill University Rossy Cancer Network Cancer Quality and Innovation research grant and a Canadian Society of Colon and Rectal Surgeons research grant.

### Competing Interests Statement

ASL receives travel stipends from Merck and Servier, and is on the advisory committee of Novadaq. JFJ received a research grant from Merck and fees for consulting from Shionogi. RG, CGL, JP, JFJ, LGB, NM, JF, GG, CAV, SRB, and MB have no relevant competing interests to declare.

### Word Count

3,205

Table 1 – Schedule of Patient-Reported Outcome Measures

|                           | Preoperatively | 1 month | 3 months | 6 months | 12 months |
|---------------------------|----------------|---------|----------|----------|-----------|
| EORTC-QLQ-C30             | X              | X       | X        | X        | X         |
| MYMOP2                    |                | X       |          | X        | X         |
| PAM-13                    | X              | X       |          | X        | X         |
| LARS Score,<br>WFIS, BQoL |                | X       | X        | X        | X         |
| HADS                      | X              | X       |          | X        | X         |
| Knowledge                 | X              | X       |          | X        |           |
| Satisfaction              |                |         |          | X        |           |

EORTC-QLQ-C30 = European Organization for Research and Treatment of Cancer Quality of Life Questionnaire – Core 30

MYMOP2 = Measure Your Medical Outcome Profile

PAM-13 = Patient Activation Measure

LARS Score = Low Anterior Resection Syndrome Score

WFIS = Wexner Fecal Incontinence Score

BQoL = Bowel-Related Quality of Life

HADS = Hospital Anxiety and Depression Scale

Table 2 – Characteristics of patient participants in focus group (caregivers not included)

| <b>Characteristics</b>                                      | <b>n = 6</b> |
|-------------------------------------------------------------|--------------|
| Age, years, median (range)                                  | 61 (32-71)   |
| Gender, n                                                   | -            |
| Male                                                        | 4            |
| Female                                                      | 2            |
| Neoadjuvant radiotherapy, n                                 | 5            |
| Diverting loop ileostomy, n                                 | 5            |
| Extent of mesorectal excision, n                            | -            |
| Partial mesorectal excision                                 | 0            |
| Total mesorectal excision                                   | 6            |
| Anastomotic height, n                                       | -            |
| Colo-Rectal Anastomosis                                     | 3            |
| Colo-Anal Anastomosis                                       | 3            |
| Anastomotic leak, n                                         | 1            |
| Months since proctectomy, median (range)                    | 15 (7-22)    |
| LARS Score, median (range)                                  | 28 (12-39)   |
| LARS Score severity, n                                      | -            |
| Major                                                       | 3            |
| Minor                                                       | 2            |
| None                                                        | 1            |
| Overall, how much does your bowel function affect your QoL? | -            |
| Not at all / very little                                    | 2            |
| Somewhat                                                    | 2            |
| A lot                                                       | 2            |
| EORTC global quality of life, median (range)                | 83 (50-100)  |

QoL = quality of life; EORTC-QLQ-C30 = European Organization for Research and Treatment of Cancer Quality of Life Questionnaire – Core 30



Table 3 – Principal findings from thematic analysis of focus group with patients and caregivers

|                                                                                                |                                                                                                                                   |
|------------------------------------------------------------------------------------------------|-----------------------------------------------------------------------------------------------------------------------------------|
| LARS is as much a psychological disorder as it is a physical condition                         | Participants felt underprepared for their new bowel function, which greatly contributed to their anxiety                          |
|                                                                                                | Participants felt alone and isolated, as if they were the only patients experiencing these symptoms                               |
|                                                                                                | Participants were never explained that symptoms may improve; most felt extremely hopeless in the first few months postoperatively |
| The booklet was easy to read and follow                                                        | Participants found that the booklet was written at an appropriate level for patients                                              |
|                                                                                                | Participants found the images extremely helpful in understanding how, and why, LARS occurs                                        |
|                                                                                                | Participants felt that the booklet was complete, and was a perfect length                                                         |
| Information was lacking in certain keys areas                                                  | Participants wanted more emphasis to be placed on emotional wellbeing in the booklet                                              |
|                                                                                                | Participants wanted more examples of foods that could trigger their LARS, as well as more detail on how to use and find an enema  |
|                                                                                                | Participants agreed that it is vital to have a dedicated nurse to review the booklet and provide additional support               |
| The booklet is an excellent resource that would have made a big difference in their first year | The booklet's greatest impact is in terms of expectation management and psychological reassurance                                 |
|                                                                                                | Participants agreed that they would have consulted the booklet frequently in the first year after surgery                         |

LARS: Low Anterior Resection Syndrome

Table 4 – Characteristics of interviewed healthcare professionals

| <b>Characteristics</b>                                        | <b>n = 10</b> |
|---------------------------------------------------------------|---------------|
| Gender, n                                                     | -             |
| Male                                                          | 5             |
| Female                                                        | 5             |
| Practice, n                                                   | -             |
| Colorectal Surgeon                                            | 7             |
| Nurse                                                         | 3             |
| Experience, years, median (range)                             | -             |
| Colorectal Surgeon                                            | 16 (9-21)     |
| Nurse                                                         | 19 (4-22)     |
| Annual rectal cancer volume, patients, median (range)         | -             |
| Colorectal Surgeon                                            | 30 (20-50)    |
| Nurse                                                         | 50 (50-75)    |
| Time spent per visit discussing LARS, minutes, median (range) | -             |
| Colorectal Surgeon                                            | 8 (5-20)      |
| Nurse                                                         | 23 (30-45)    |

Table 5 – Principal findings from thematic analysis of semi-structured interviews with healthcare professionals

|                                                            |                                                                                                                                              |
|------------------------------------------------------------|----------------------------------------------------------------------------------------------------------------------------------------------|
| Barriers to effectively educating patients on LARS         | All HCPs felt that “insufficient time in their schedules” was the most significant barrier to adequately discussing LARS with their patients |
|                                                            | Most HCPs felt that information provided to patients in clinic is often not retained                                                         |
|                                                            | Most HCPs did not have a consistent resource on LARS to offer to patients                                                                    |
| The booklet is accurate, comprehensive, and easy to read   | All HCPs felt that the major points on LARS were covered                                                                                     |
|                                                            | Most HCPs felt that less information on rectal cancer was needed in the booklet                                                              |
|                                                            | All HCPs felt that the illustrations were accurate and helpful in explaining LARS                                                            |
|                                                            | Several additional medications were recommended (e.g., codeine, amitriptyline)                                                               |
| The booklet is a clinically relevant resource for patients | All HCPs would give this booklet to their patients, and believe that it would a helpful supportive resource                                  |
|                                                            | All HCPs would give it just prior to surgery (or ileostomy closure, if a stoma was performed)                                                |

LARS = Low Anterior Resection Syndrome; HCP = healthcare professional

1  
2  
3  
4  
5  
6  
7  
8  
9  
10  
11  
12  
13  
14  
15  
16  
17  
18  
19  
20  
21  
22  
23  
24  
25  
26  
27  
28  
29  
30  
31  
32  
33  
34  
35  
36  
37  
38  
39  
40  
41  
42  
43  
44  
45  
46  
47  
48  
49  
50  
51  
52  
53  
54  
55  
56  
57  
58  
59  
60

**Figures Legend**

Figure 1 – Study timeline for patients in the LARS Patient-Centered Program

Figure 2 – Study timeline for patients in the Standard Care Group

For peer review only

# LARS STUDY TIMELINE

## LARS Patient-Centered Program

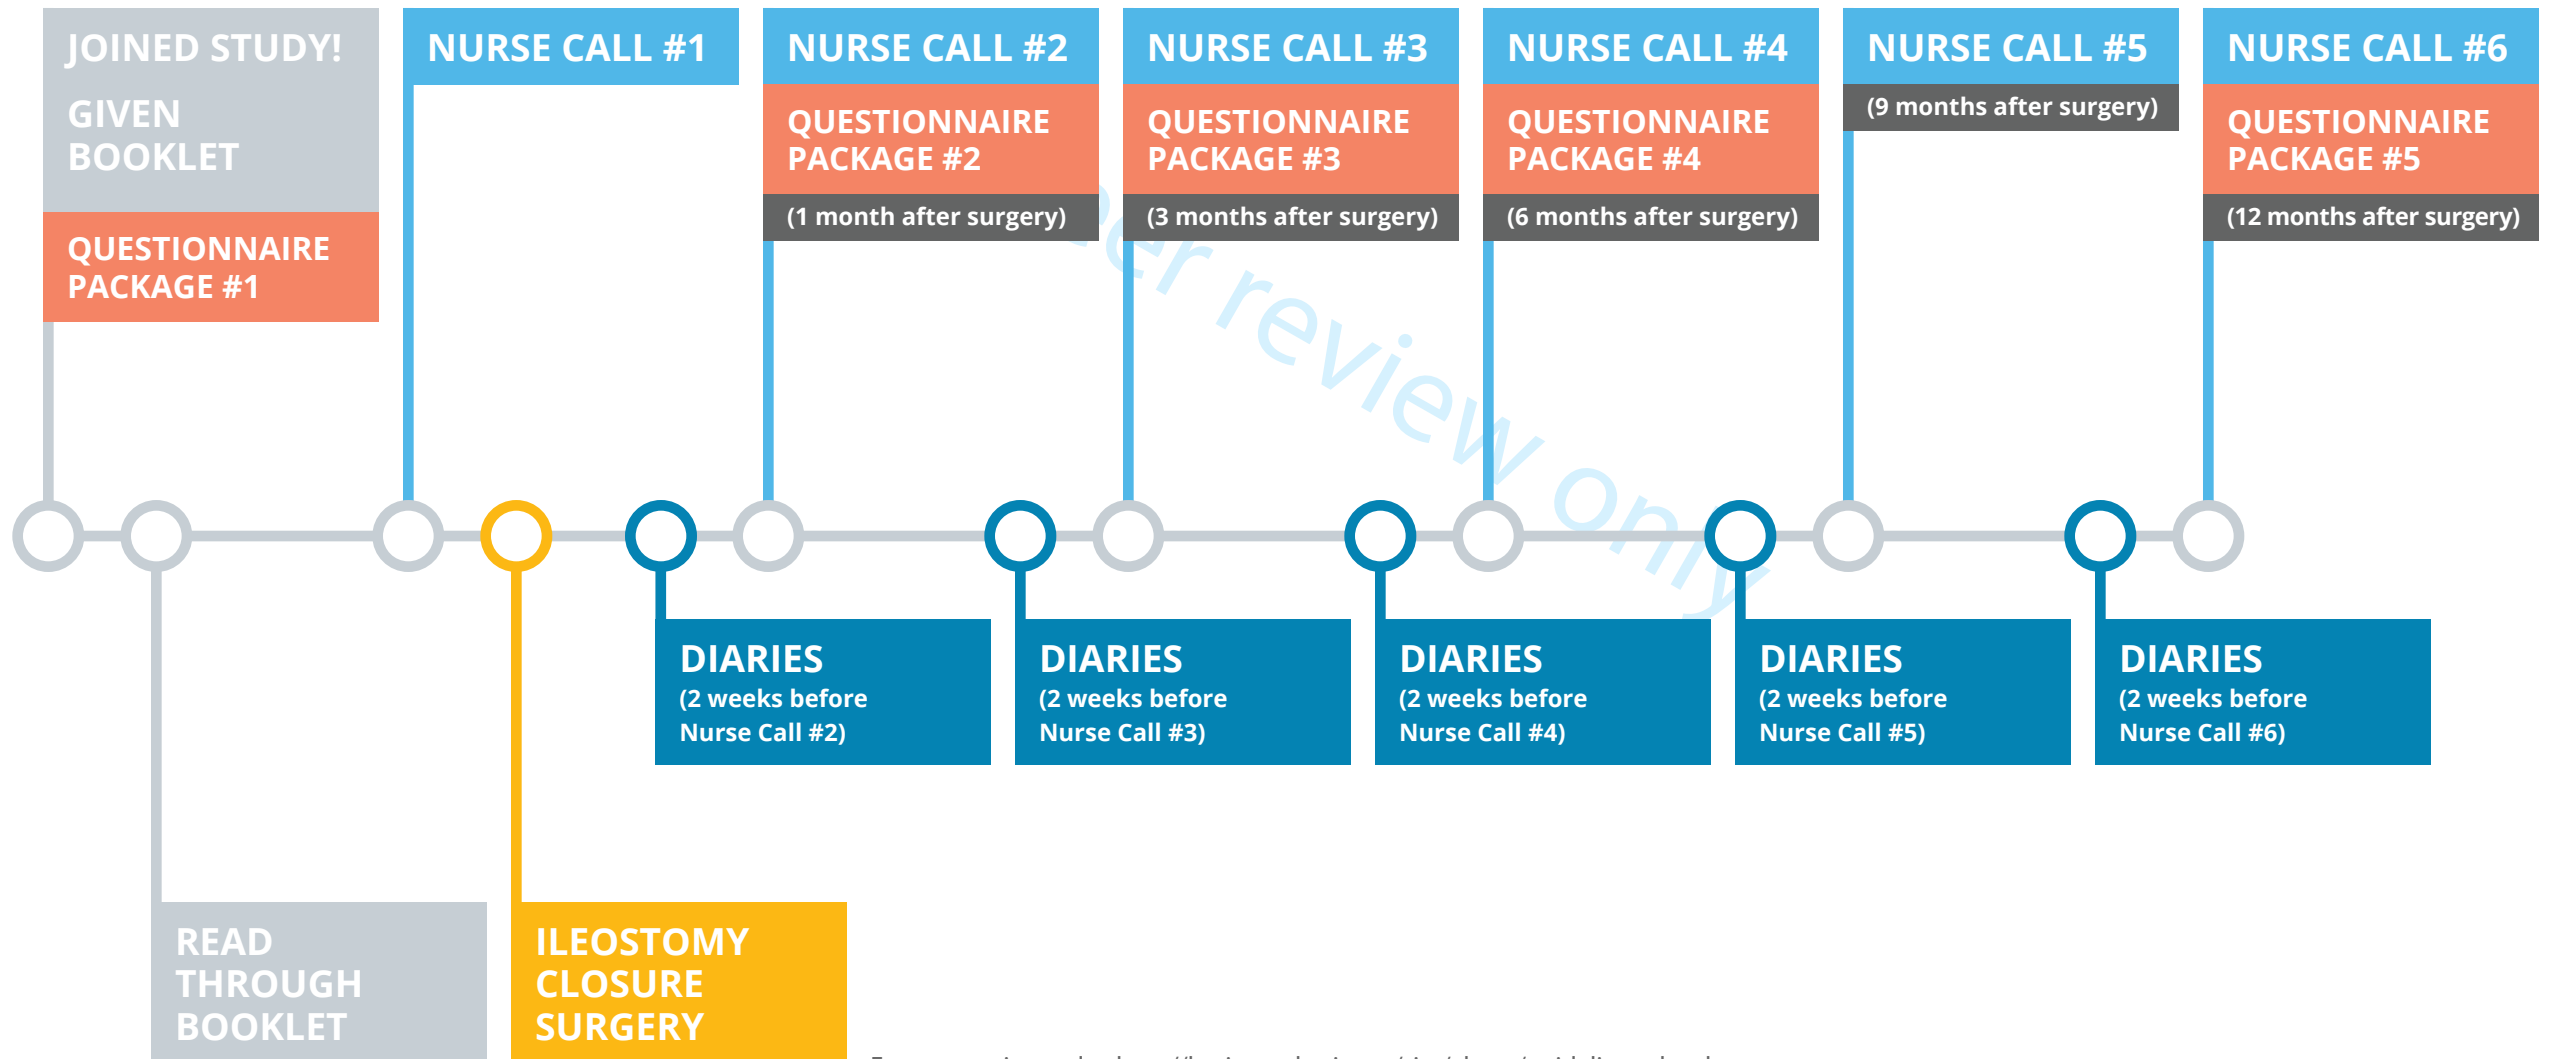

# LARS STUDY TIMELINE

## Standard Care

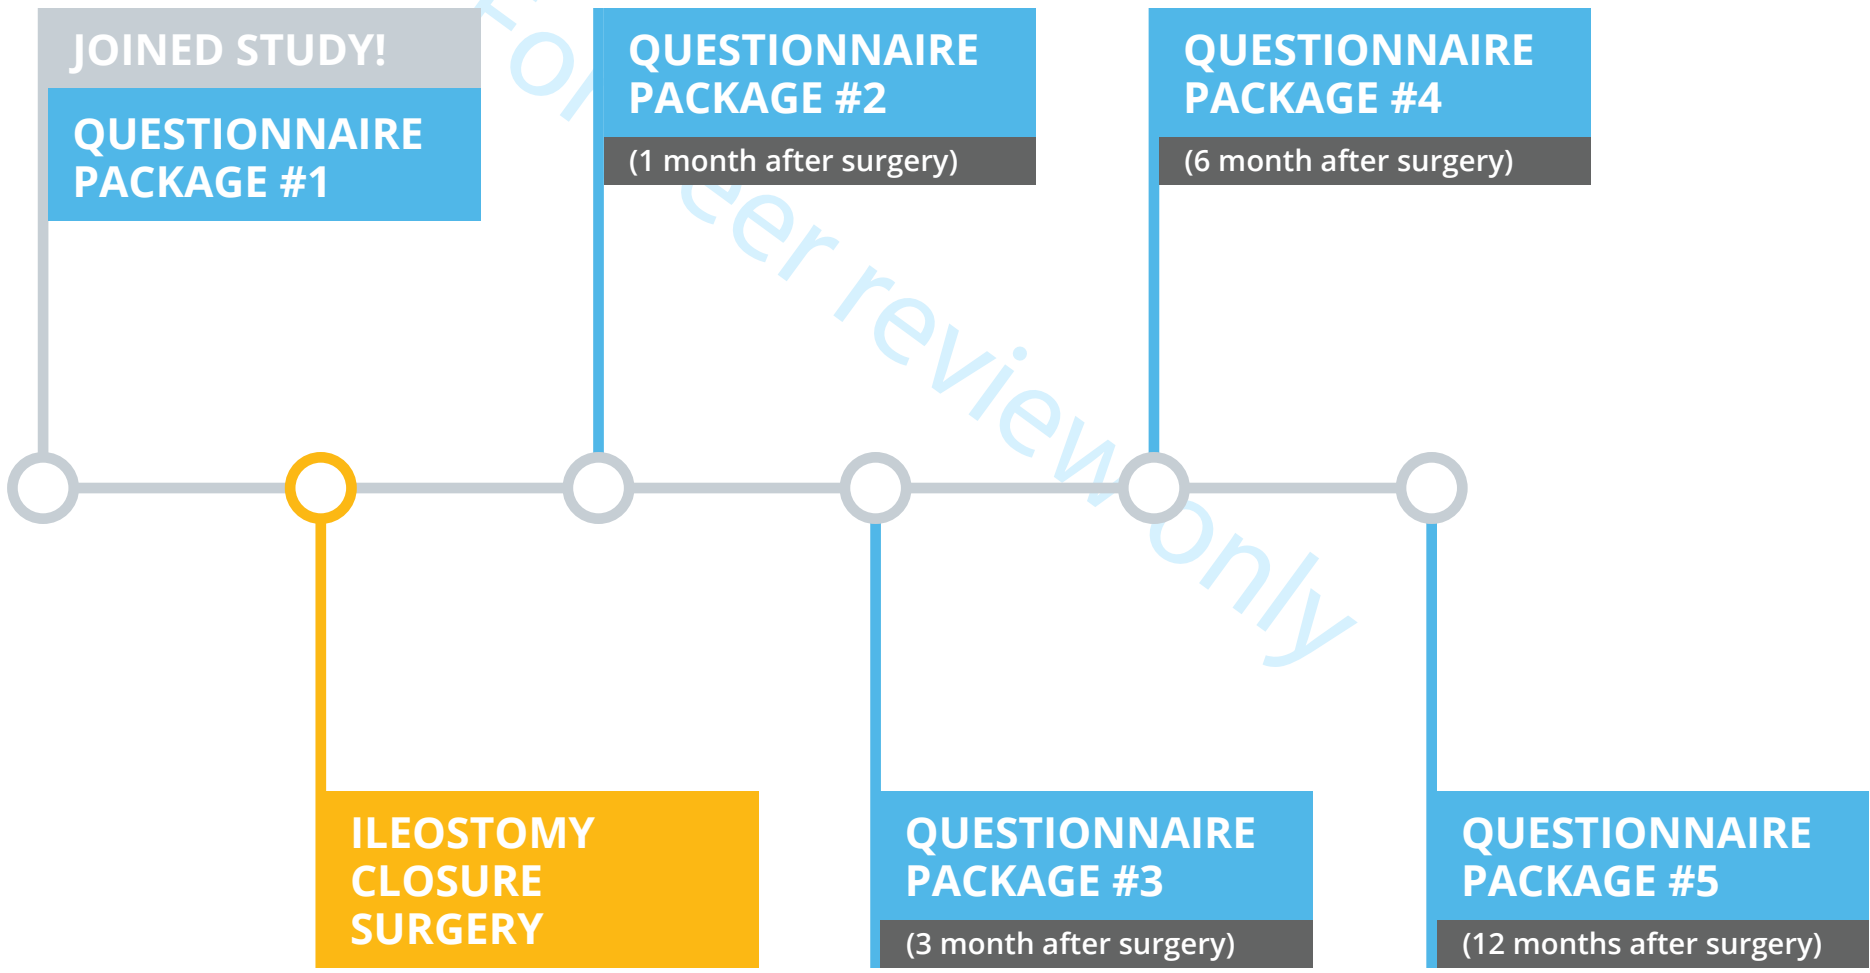

1  
2  
3 Supplementary File 1 – Semi-structured interview guide for focus group with patients and  
4 caregivers  
5

## 6 **Introduction**

7  
8  
9 Good afternoon everybody and welcome! Thank you for being here today and for helping us in  
10 the creation of our educational booklet on Low Anterior Resection Syndrome, also know as  
11 LARS.  
12

13 Today I will be asking you about your impressions and feedback of the booklet.  
14

15  
16 My name is Richard Garfinkle – I am a senior resident in General Surgery and have been  
17 conducting research with the Colorectal Surgery group for many years.  
18

19 You were all invited because you've all undergone surgery for rectal cancer and have been  
20 identified by your doctors as having experience with bowel dysfunction since your operation.  
21 Your doctors also thought you'd be great participants for this focus group, and we appreciate  
22 your input.  
23

24  
25 There are no wrong answers but rather differing points of view.  
26

27 Please feel free to share your point of view even if it differs from what others have said. Keep in  
28 mind that we're just as interested in negative comments as positive comments, and at times the  
29 negative comments are the most helpful.  
30

31  
32 You've probably noticed the microphone. We're tape recording the session because we don't  
33 want to miss any of your comments. People often say very helpful things in these discussions  
34 and we can't write fast enough to get them all down. We will be on a first name basis today but  
35 we won't use any names in our reports. You may be assured of complete confidentiality.  
36

37  
38 To respect each other's confidentiality, what has been said here will stay here. Is everyone  
39 comfortable with that?  
40

41 In respect of everyone's time, we will try to wrap this up in under an hour. We may go a little  
42 over, but not more than 15 minutes. Is everyone okay with that? If you have to leave at any point,  
43 not a problem, just let me know when.  
44

45  
46 Well, let's begin. We've placed name cards on the table in front of you to help us remember each  
47 other's names. Let's find out some more about each other by going around the table. Everyone  
48 can introduce themselves by name, and in one or two sentences, describe your story with rectal  
49 cancer and your treatment.  
50

51 *Given everyone a chance to speak.*  
52 *Then proceed with the following:*  
53

54  
55 Now that everyone has been introduced, we can go on with discussing the LARS booklet.  
56  
57  
58  
59  
60

## General overview

Overall what is your impression of the booklet?

Who had heard about LARS before reading this booklet, and how / from where?

Was LARS or bowel function after surgery discussed with your surgeon?

What did you like about the booklet?

What did you not like about the booklet?

Have you read or found similar booklets like this one in the past, and where did you find them?

## Content

Did you like the information that was chosen for the booklet?

Was there any topic about LARS that was discussed in too much detail?

Was there any topic about LARS that was discussed in too little detail, or not discussed at all?

How was the overall length of the booklet?

In your experience dealing with LARS, have you learnt any tips and tricks that should be added to the booklet?

Are there important abdominal or bowel symptoms that you've had to deal with that are missing from this booklet?

What new information did you learn from this booklet?

For the caregivers in the room: how can the booklet be made better for caregivers to learn about LARS?

## Clinical relevance

Would you have liked to receive a booklet like this before your rectal cancer operation?

How would this booklet have better prepared you for life after surgery?

Would you like an Internet (online) or mobile-application version of the booklet?

Do you see yourself reading over this booklet only before surgery, or would you use it again after surgery?

## LARS diaries

Have you used bowel or food diaries before? And who suggested you use one?

How did using a diary help you?

What are your thoughts about the diaries that we've included in the booklet?

Would you use these diaries? And how often?

Would you prefer the diary as an online diary or as an app?

How would you improve the diaries?

## Final comments

Do you have any final comments?



1  
2  
3 We've come to the end. Thank you everyone for your time and feedback! It is really appreciated  
4 and the past hour or so has been very productive. If anyone has any concerns or anything they  
5 want taken out of the recording, let me know, it's not a problem. I'll stick around after to talk if  
6 you have anything to say.  
7  
8  
9  
10  
11  
12  
13  
14  
15  
16  
17  
18  
19  
20  
21  
22  
23  
24  
25  
26  
27  
28  
29  
30  
31  
32  
33  
34  
35  
36  
37  
38  
39  
40  
41  
42  
43  
44  
45  
46  
47  
48  
49  
50  
51  
52  
53  
54  
55  
56  
57  
58  
59  
60

For peer review only

## Supplementary File 2 – Semi-structured interview guide for healthcare professionals

### Introduction

Thank you for agreeing to be part of this study exploring the educational needs of rectal cancer survivors with Low Anterior Resection Syndrome (or LARS). You've been given our educational booklet that we created for patients to use as part of an intervention in a randomized controlled trial, and have agreed to participate in a brief phone interview.

The phone interview will take about 20 minutes. Is now a good time?

Thank you for reading through our first draft of the educational booklet. To ensure that the booklet is relevant and that the content is both accurate and helpful, we appreciate your feedback. This will allow us to improve the booklet prior to giving it to patients.

### Participant demographics

What is your full name, role, and institution of work?

How many years have you been in your role?

What volume of rectal cancer patients do you treat a year?

How much time do you currently spend per rectal cancer patient discussing LARS?

What are the barriers to spending more time with patients on this subject?

### General overview

What was your overall impression of the booklet?

What are your thoughts regarding the layout and structure of the booklet?

Does the order of topics make sense?

What are your thoughts regarding the images and illustrations selected?

What was your favorite part / least favorite part of the booklet?

### Content

Did you notice any inaccurate statements in the booklet?

Is there any important aspect of LARS that is missing from the booklet?

Are there any topics that are explored in too much / too little detail?

Do you have any additional tips and tricks regarding LARS treatment that are not included in the booklet?

Did you learn anything new?

### Clinical relevance

Do you think this booklet would be useful for patients?

Would you recommend this booklet to patients and to colleagues?

How can the booklet be made more relevant for patients to use?

Do you think patients would like an online or mobile-application platform for the booklet?

1  
2  
3 If this booklet is found to be beneficial for patients, how would you incorporate this booklet into  
4 clinical practice in the future?  
5

### 6 **LARS diaries**

7  
8  
9 Do you find the diaries useful for patients?

10 Have you ever instructed patients to use a bowel or food diary, and what has been their  
11 compliance?

12 What important information is missing from the diaries that might be helpful for patients to  
13 better reflect on their bowel symptoms?  
14

### 15 **Final comments**

16  
17  
18 Do you have any final comments?  
19

20  
21  
22 We thank you very much for your participation in this interview. Your feedback is greatly  
23 appreciated and will help us refine this booklet for the betterment of patient education.  
24  
25  
26  
27  
28  
29  
30  
31  
32  
33  
34  
35  
36  
37  
38  
39  
40  
41  
42  
43  
44  
45  
46  
47  
48  
49  
50  
51  
52  
53  
54  
55  
56  
57  
58  
59  
60

## Supplementary File 3 – Patient consent form

### **Introduction:**

You are being invited to be a research participant. This research is designed to investigate the use of a supportive intervention on patient-reported outcomes in patients who have undergone surgery for rectal cancer. You have the right to know about the purpose and procedures that are to be used in this research study, and to be informed about the potential benefits and risks of this research.

Before you agree to take part in this study, it is important that you read the information in this consent form. You should ask as many questions as you need to in order to understand what you will be asked to do. You do not have to take part in this study if you do not want to.

The Medical/Biomedical (MBM) Research Ethics Committee of the Centre intégré universitaire de santé et de services sociaux of West Central Montreal Health (CIUSSS WCMH) has approved and is responsible for the continuing ethical oversight of the study at the Jewish General Hospital.

### **Goals and Objectives:**

After surgery for rectal cancer, many patients suffer from Low Anterior Resection Syndrome (LARS), which includes a variety of negative bowel-related symptoms as a consequence of removing the rectum. LARS can negatively impact quality of life. **The goal of this study is to evaluate the impact of a supportive intervention for LARS, with the hopes that it will improve various outcomes in patient care after surgery.** Specifically, to identify whether our supportive intervention focusing on LARS can:

- improve the quality of life among patients undergoing surgery for rectal cancer
- increase patient engagement in their own healthcare, as measured by the “Patient Activation Measure” (a questionnaire designed at evaluating the patient’s knowledge, skills, and confidence in care for their own health)
- improve bowel symptoms
- decrease emotional distress

### **Procedures:**

- We are inviting all patients who underwent a Low Anterior Resection to remove a tumor in the rectum and who had a temporary ostomy (“bag”), and who are now scheduled to have their ostomy closure operation (the “reconnection” operation).
- As part of the study, we will access your medical chart from the hospital and collect some important information regarding your rectal cancer operation, as part of the research.
- You will then be randomly assigned to either the supportive intervention group or the control group (no supportive intervention), meaning that you will have a 50/50 chance of receiving the LARS education
- **The supportive intervention group** will receive two resources to help them manage their LARS:
  - 1) Educational booklet

1  
2  
3  
4  
5  
6  
7  
8  
9  
10

## 2) Specialized nursing care

- The **control group** will **not** have access to the two resources listed above. That does not mean that control group participants shouldn't be counseled on LARS. These participants will have access to any resources that are normally available at their hospital. This may include discussions with their colorectal surgeon in the office, appointments with a nurse, and any pamphlets or online resources that your doctor might normally recommend.

### *Participants in the intervention group*

#### *Educational Booklet*

- Participants in the intervention group will have access to an educational booklet.
- This educational booklet offers all of the essential information on LARS, including tips and tricks on how to best manage LARS at home.
- It also offers special diaries for various aspects of treatment, where participants can be expected to write down different things that did, or did not, work for their LARS. This will help reinforce positive behaviors that have helped.

#### *Specialized nursing care*

- Participants in the intervention group will have access to a specialized nurse with many years of experience caring for rectal cancer patients. The nurse will speak with participants once before their surgery and walk them through the educational booklet.
- After surgery, the nurse will call participants 5 more times during the first 12 months – at 1 month, 3 months, 6 months, 9 months, and 12 months – to answer any questions, and review the diaries.
- Lastly, the nurse will have “office hours” once a week, where she will be available by telephone or by email to answer more urgent questions.
- It is important to remember that the role of this nurse is only to help with LARS care, and she does not replace a doctor for more urgent medical issues. The nurse will use her years of experience and professional judgment to decide what sort of issues might fall outside of her role.

### *Participants in both groups*

- Participants in both the intervention and control groups will receive several questionnaires, which will allow us to understand if the supportive intervention is helping patients with their LARS.
- **Questionnaires** will be sent out once before surgery, and then 4 more times after surgery – **at 1 month, 3 months, 6 months, and 12 months.**
- Questionnaires can either be mailed to you, sent by email, or answered over the phone – whichever you prefer. If you choose to have the questionnaires mailed to you we will include an envelope and postage so that you can send back the completed questionnaires.
- You may receive telephone calls from our research coordinator to ensure that you have received the questionnaires.

### **Duration**

All participants, whether part of the intervention group or control group, will be followed for the first 12 months after their surgery. The first questionnaire is to be completed just prior to surgery, and the final questionnaire 12 months after surgery. After the 12 months have passed, we will not contact you for any other reasons related to the study.

### **Reimbursements**

Participants will receive \$10 for each set of completed questionnaires, and \$20 once all questionnaires are completed. The 10\$ gift for each completed set of questionnaires will be sent to participants as soon as the completed questionnaire is received by the research team.

### **Risks, Discomforts and Side-Effects:**

By taking part in this study, you should be at no increased risk for unwanted side-effects or discomfort. No new medication is being recommended for the purpose of the study. All of the treatment strategies recommended in the educational booklet and by the specialized nurse are considered “standard” treatments, and are usually already discussed by the treating surgeon. If any of the questions make you uncomfortable you may choose not to answer them, or, if you become upset you may contact the PI, the nurse or any member of the research team.

### **Benefits:**

If you are part of the supportive intervention group, we hope (and anticipate) that your knowledge regarding LARS will increase, and that you might be more active in the care of your LARS. Because of this, you may experience improvements in your quality of life and even in the severity of your LARS symptoms. If you are part of the control group, you will be less likely to get any benefit, as you are acting as a comparison group to see if our intervention is making a difference. At the end of the study, regardless of the findings, we will make our educational booklet publicly available to all participants.

That being said, we cannot guarantee that you will receive any direct benefits from this study.

### **Voluntary participation/withdrawal:**

Your participation in this research project is voluntary. Therefore, you may refuse to participate. You may also withdraw from the study at any time, without giving any reason.

Your decision not to participate in the study, or to withdraw from it, will have no impact on the quality of care and services to which you are otherwise entitled, or on your relationship with the doctor in charge of this research study or the clinical team.

If you withdraw or are withdrawn from the study, the information collected during the study will nonetheless be stored, analyzed or used to protect the scientific integrity of the research project.

### **Unexpected discoveries**

1  
2  
3  
4 Any new findings that could influence your decision to stay in the research project will be shared  
5 with you as soon as possible. If this happens, we will contact you to set up a visit with your treating  
6 surgeon or oncologist. This physician will share this information with you and plan your  
7 subsequent management.  
8

### 9 10 **Confidentiality:**

11  
12 While you take part in this research study, the researcher in charge and study staff will collect and  
13 store personal identifiable information about you in a file for the purpose of the research study.  
14 Only information necessary for the research study will be collected.  
15

16  
17 All the information collected about you during the study will remain confidential within the limits  
18 of the Law. To protect your identity, your name and identifying information will be replaced with  
19 a code number that has no identifying information. The code will be linked to your hospital ID and  
20 the link between the code and your identity will be held by the researcher in charge of the study.  
21 No information that discloses your identity will be allowed to leave the institution. Your study  
22 information will be kept in a de-identified manner for 10 years by the researcher in charge of the  
23 study, after which it will be anonymized. The data will be held in a password protected file and a  
24 password protected computer in locked offices at the Jewish General Hospital. After 10 years, the  
25 anonymized data will be kept indefinitely by the Investigator for the purposes of future research  
26 in colorectal surgery. After 10 years, the consent forms will be shredded in the confidential bin  
27 provided by the CIUSSS du Centre-Ouest-de-L'île-de-Montreal.  
28  
29

30  
31 The study information may also be used for other reasons related to the study or to help in the  
32 development of future studies.  
33

34 The study information could be printed/published in medical journals or shared with other people  
35 at scientific meetings, but your identity will not be revealed.  
36

37  
38 For monitoring, control and protection purposes, your research study file as well as your medical  
39 file could be checked by a person authorized by the Research Ethics Committee of the CIUSSS du  
40 Centre-Ouest-de-l'île de Montreal or by persons mandated by authorized public agencies. These  
41 persons are bound by a confidentiality agreement.  
42

43  
44 For safety purposes, and in order to communicate information that is required in order to protect  
45 your well-being, the principal researcher of this study will keep separate from the research  
46 documents your personal information including your name, contact information, the date your  
47 participation in the study began and when it ended for the period of ten years after the end of the  
48 study. The data will be kept in a de-identified manner for 10 years following study completion  
49 and then it will be anonymized for use in future studies on colorectal surgery. After 10 years, the  
50 consent forms will be shredded in the confidential bin provided by the CIUSSS du Centre-Ouest-  
51 de-L'île-de-Montreal.  
52

53  
54 You have the right to look at your study file in order to check the information gathered about you  
55 and to correct it, if necessary, as long as the study researcher or the institution keeps this  
56  
57  
58  
59

1  
2  
3 information. However, you may only have access to certain information once the study has ended  
4 so that the quality of the research study is protected.  
5

6  
7 **Should you suffer any harm:**

8  
9 By agreeing to participate in this research study, you do not give up any of your legal rights nor  
10 discharging the doctor in charge of this research study or the institution of their civil and  
11 professional responsibilities.  
12

13  
14 **Investigator Compensation**

15  
16 The researcher in charge of this study has been awarded funding from a various professional  
17 medical societies and research granting agencies, to help cover the cost of running the study. The  
18 funds have been deposited into a research and development account.  
19

20  
21 **Contact information or questions:**

22  
23 If you have any questions regarding the study, you may ask them now or later, even after the study  
24 has started. If you wish to ask questions later, you may contact any of the following:  
25

26 Dr. Marylise Boutros, Primary Investigator  
27 Jewish General Hospital  
28 3755 Cote Ste Catherine G-317  
29 Montreal, QC, H3T 1E2  
30 T: 514-340-8222 ext. 22773  
31 mboutros@jgh.mcgill.ca  
32  
33

34 Dr. Richard Garfinkle, Co-Investigator  
35 3755 Cote Ste Catherine G-317  
36 Montreal, QC, H3T 1E2  
37 T: 514-515-1995  
38 [richard.garfinkle@mail.mcgill.ca](mailto:richard.garfinkle@mail.mcgill.ca)  
39  
40

41 Sarah Sabboobeh, Research Coordinator  
42 3755 Cote Ste Catherine G308  
43 Montreal, QC, H3T 1E2  
44 T: 514-340-8222 ext 22773  
45 Sarah.sabboobeh@ladydavis.ca  
46  
47

48 For all questions regarding your rights as a research participant for this study, or if you have  
49 comments or wish to make a complaint, you may contact the Local Commissioner of Complaints  
50 and Quality of Services of the CIUSSS du Centre-Ouest-de-l'ile-de-Montreal at 514-340-8222 ext.  
51 24222.  
52  
53  
54  
55  
56  
57  
58  
59  
60



**STATEMENT OF CONSENT**  
**Impact of a Patient-Centered Program for Low Anterior Resection Syndrome**

I have reviewed the information and consent form. Both the research study and the information contained in the consent form were explained to me. All my questions were answered, and I was given sufficient time to make a decision. After reflection, I consent to participate in this research study in accordance with the conditions stated above.

I authorize the research study team to have access to my medical record and biopsy results for the purposes of this study. I do not give up any of my legal rights by signing this consent form.

I agree to be re-contacted by the study team in the future regarding further participation in this study or to be asked about participation in other studies. Agreeing to be re-contacted does not mean I have to participate in these other studies.

YES    NO    INITIALS



---

Name of the Participant

Signature

Date

Consent form administered and explained in person by:

---

Name of the person obtaining consent

Signature

Date

I certify that this information and consent form were explained to the research participant, and that the questions the participant had were answered. I undertake, together with the research team, to respect what was agreed upon in the information and consent form, and to give a signed and dated copy of this form to the research participant.

---

Name of the Investigator

Signature

Date

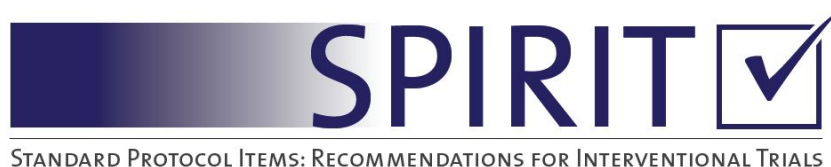

SPIRIT 2013 Checklist: Recommended items to address in a clinical trial protocol and related documents\*

| Section/item                      | Item No | Description                                                                                                                                                                                                                                                                                                       |
|-----------------------------------|---------|-------------------------------------------------------------------------------------------------------------------------------------------------------------------------------------------------------------------------------------------------------------------------------------------------------------------|
| <b>Administrative information</b> |         |                                                                                                                                                                                                                                                                                                                   |
| Title                             | 1       | Descriptive title identifying the study design, population, interventions, and, if applicable, trial acronym<br><b>Yes – page 1</b>                                                                                                                                                                               |
| Trial registration                | 2a      | Trial identifier and registry name. If not yet registered, name of intended registry<br><b>Yes – page 3 and 14</b>                                                                                                                                                                                                |
|                                   | 2b      | All items from the World Health Organization Trial Registration Data Set                                                                                                                                                                                                                                          |
| Protocol version                  | 3       | Date and version identifier                                                                                                                                                                                                                                                                                       |
| Funding                           | 4       | Sources and types of financial, material, and other support<br><b>Yes – page 21</b>                                                                                                                                                                                                                               |
| Roles and responsibilities        | 5a      | Names, affiliations, and roles of protocol contributors<br><b>Yes – page 21</b>                                                                                                                                                                                                                                   |
|                                   | 5b      | Name and contact information for the trial sponsor<br><b>Not applicable</b>                                                                                                                                                                                                                                       |
|                                   | 5c      | Role of study sponsor and funders, if any, in study design; collection, management, analysis, and interpretation of data; writing of the report; and the decision to submit the report for publication, including whether they will have ultimate authority over any of these activities<br><b>Not applicable</b> |
|                                   | 5d      | Composition, roles, and responsibilities of the coordinating centre, steering committee, endpoint adjudication committee, data management team, and other individuals or groups overseeing the trial, if applicable (see Item 21a for data monitoring committee)                                                  |
| <b>Introduction</b>               |         |                                                                                                                                                                                                                                                                                                                   |
| Background and rationale          | 6a      | Description of research question and justification for undertaking the trial, including summary of relevant studies (published and unpublished) examining benefits and harms for each intervention<br><b>Yes – pages 5 and 6</b>                                                                                  |

|    |                                                           |     |                                                                                                                                                                                                                                                                                                                                                                                |
|----|-----------------------------------------------------------|-----|--------------------------------------------------------------------------------------------------------------------------------------------------------------------------------------------------------------------------------------------------------------------------------------------------------------------------------------------------------------------------------|
| 1  |                                                           | 6b  | Explanation for choice of comparators                                                                                                                                                                                                                                                                                                                                          |
| 2  |                                                           |     |                                                                                                                                                                                                                                                                                                                                                                                |
| 3  |                                                           |     |                                                                                                                                                                                                                                                                                                                                                                                |
| 4  | Objectives                                                | 7   | Specific objectives or hypotheses                                                                                                                                                                                                                                                                                                                                              |
| 5  |                                                           |     | <b>Yes – page 7</b>                                                                                                                                                                                                                                                                                                                                                            |
| 6  |                                                           |     |                                                                                                                                                                                                                                                                                                                                                                                |
| 7  | Trial design                                              | 8   | Description of trial design including type of trial (eg, parallel group, crossover, factorial, single group), allocation ratio, and framework (eg, superiority, equivalence, noninferiority, exploratory)                                                                                                                                                                      |
| 8  |                                                           |     |                                                                                                                                                                                                                                                                                                                                                                                |
| 9  |                                                           |     |                                                                                                                                                                                                                                                                                                                                                                                |
| 10 |                                                           |     |                                                                                                                                                                                                                                                                                                                                                                                |
| 11 |                                                           |     | <b>Yes – pages 7, 8 and 9</b>                                                                                                                                                                                                                                                                                                                                                  |
| 12 |                                                           |     |                                                                                                                                                                                                                                                                                                                                                                                |
| 13 | <b>Methods: Participants, interventions, and outcomes</b> |     |                                                                                                                                                                                                                                                                                                                                                                                |
| 14 |                                                           |     |                                                                                                                                                                                                                                                                                                                                                                                |
| 15 | Study setting                                             | 9   | Description of study settings (eg, community clinic, academic hospital) and list of countries where data will be collected. Reference to where list of study sites can be obtained                                                                                                                                                                                             |
| 16 |                                                           |     |                                                                                                                                                                                                                                                                                                                                                                                |
| 17 |                                                           |     |                                                                                                                                                                                                                                                                                                                                                                                |
| 18 |                                                           |     |                                                                                                                                                                                                                                                                                                                                                                                |
| 19 |                                                           |     | <b>Yes – page 7</b>                                                                                                                                                                                                                                                                                                                                                            |
| 20 |                                                           |     |                                                                                                                                                                                                                                                                                                                                                                                |
| 21 | Eligibility criteria                                      | 10  | Inclusion and exclusion criteria for participants. If applicable, eligibility criteria for study centres and individuals who will perform the interventions (eg, surgeons, psychotherapists)                                                                                                                                                                                   |
| 22 |                                                           |     |                                                                                                                                                                                                                                                                                                                                                                                |
| 23 |                                                           |     |                                                                                                                                                                                                                                                                                                                                                                                |
| 24 |                                                           |     |                                                                                                                                                                                                                                                                                                                                                                                |
| 25 |                                                           |     | <b>Yes – page 7</b>                                                                                                                                                                                                                                                                                                                                                            |
| 26 |                                                           |     |                                                                                                                                                                                                                                                                                                                                                                                |
| 27 | Interventions                                             | 11a | Interventions for each group with sufficient detail to allow replication, including how and when they will be administered                                                                                                                                                                                                                                                     |
| 28 |                                                           |     |                                                                                                                                                                                                                                                                                                                                                                                |
| 29 |                                                           |     | <b>Yes – pages 8, 9 and 10</b>                                                                                                                                                                                                                                                                                                                                                 |
| 30 |                                                           |     |                                                                                                                                                                                                                                                                                                                                                                                |
| 31 |                                                           | 11b | Criteria for discontinuing or modifying allocated interventions for a given trial participant (eg, drug dose change in response to harms, participant request, or improving/worsening disease)                                                                                                                                                                                 |
| 32 |                                                           |     |                                                                                                                                                                                                                                                                                                                                                                                |
| 33 |                                                           |     |                                                                                                                                                                                                                                                                                                                                                                                |
| 34 |                                                           |     |                                                                                                                                                                                                                                                                                                                                                                                |
| 35 |                                                           |     | <b>Not applicable</b>                                                                                                                                                                                                                                                                                                                                                          |
| 36 |                                                           |     |                                                                                                                                                                                                                                                                                                                                                                                |
| 37 |                                                           | 11c | Strategies to improve adherence to intervention protocols, and any procedures for monitoring adherence (eg, drug tablet return, laboratory tests)                                                                                                                                                                                                                              |
| 38 |                                                           |     |                                                                                                                                                                                                                                                                                                                                                                                |
| 39 |                                                           |     |                                                                                                                                                                                                                                                                                                                                                                                |
| 40 |                                                           |     |                                                                                                                                                                                                                                                                                                                                                                                |
| 41 |                                                           |     | <b>Yes – pages 10 and 13</b>                                                                                                                                                                                                                                                                                                                                                   |
| 42 |                                                           |     |                                                                                                                                                                                                                                                                                                                                                                                |
| 43 |                                                           | 11d | Relevant concomitant care and interventions that are permitted or prohibited during the trial                                                                                                                                                                                                                                                                                  |
| 44 |                                                           |     |                                                                                                                                                                                                                                                                                                                                                                                |
| 45 |                                                           |     | <b>Yes – pages 8 and 9</b>                                                                                                                                                                                                                                                                                                                                                     |
| 46 |                                                           |     |                                                                                                                                                                                                                                                                                                                                                                                |
| 47 | Outcomes                                                  | 12  | Primary, secondary, and other outcomes, including the specific measurement variable (eg, systolic blood pressure), analysis metric (eg, change from baseline, final value, time to event), method of aggregation (eg, median, proportion), and time point for each outcome. Explanation of the clinical relevance of chosen efficacy and harm outcomes is strongly recommended |
| 48 |                                                           |     |                                                                                                                                                                                                                                                                                                                                                                                |
| 49 |                                                           |     |                                                                                                                                                                                                                                                                                                                                                                                |
| 50 |                                                           |     |                                                                                                                                                                                                                                                                                                                                                                                |
| 51 |                                                           |     |                                                                                                                                                                                                                                                                                                                                                                                |
| 52 |                                                           |     |                                                                                                                                                                                                                                                                                                                                                                                |
| 53 |                                                           |     |                                                                                                                                                                                                                                                                                                                                                                                |
| 54 |                                                           |     | <b>Yes – pages 10, 11 and 12</b>                                                                                                                                                                                                                                                                                                                                               |
| 55 |                                                           |     |                                                                                                                                                                                                                                                                                                                                                                                |
| 56 |                                                           |     |                                                                                                                                                                                                                                                                                                                                                                                |
| 57 |                                                           |     |                                                                                                                                                                                                                                                                                                                                                                                |
| 58 |                                                           |     |                                                                                                                                                                                                                                                                                                                                                                                |
| 59 |                                                           |     |                                                                                                                                                                                                                                                                                                                                                                                |
| 60 |                                                           |     |                                                                                                                                                                                                                                                                                                                                                                                |

|    |             |    |                                                                      |
|----|-------------|----|----------------------------------------------------------------------|
| 1  |             |    |                                                                      |
| 2  | Participant | 13 | Time schedule of enrolment, interventions (including any run-ins and |
| 3  | timeline    |    | washouts), assessments, and visits for participants. A schematic     |
| 4  |             |    | diagram is highly recommended (see Figure)                           |
| 5  |             |    | <b>Yes – Figures 1 and 2</b>                                         |
| 6  |             |    |                                                                      |
| 7  | Sample size | 14 | Estimated number of participants needed to achieve study objectives  |
| 8  |             |    | and how it was determined, including clinical and statistical        |
| 9  |             |    | assumptions supporting any sample size calculations                  |
| 10 |             |    | <b>Yes – page 13</b>                                                 |
| 11 |             |    |                                                                      |
| 12 |             |    |                                                                      |
| 13 | Recruitment | 15 | Strategies for achieving adequate participant enrolment to reach     |
| 14 |             |    | target sample size                                                   |
| 15 |             |    | <b>Yes – page 13</b>                                                 |
| 16 |             |    |                                                                      |

### Methods: Assignment of interventions (for controlled trials)

#### Allocation:

|    |                |     |                                                                         |
|----|----------------|-----|-------------------------------------------------------------------------|
| 21 |                |     |                                                                         |
| 22 | Sequence       | 16a | Method of generating the allocation sequence (eg, computer-             |
| 23 | generation     |     | generated random numbers), and list of any factors for stratification.  |
| 24 |                |     | To reduce predictability of a random sequence, details of any planned   |
| 25 |                |     | restriction (eg, blocking) should be provided in a separate document    |
| 26 |                |     | that is unavailable to those who enrol participants or assign           |
| 27 |                |     | interventions                                                           |
| 28 |                |     | <b>Yes – page 7 and 8</b>                                               |
| 29 |                |     |                                                                         |
| 30 |                |     |                                                                         |
| 31 | Allocation     | 16b | Mechanism of implementing the allocation sequence (eg, central          |
| 32 | concealment    |     | telephone; sequentially numbered, opaque, sealed envelopes),            |
| 33 | mechanism      |     | describing any steps to conceal the sequence until interventions are    |
| 34 |                |     | assigned                                                                |
| 35 |                |     | <b>Yes – page 7 and 8</b>                                               |
| 36 |                |     |                                                                         |
| 37 |                |     |                                                                         |
| 38 | Implementation | 16c | Who will generate the allocation sequence, who will enrol participants, |
| 39 |                |     | and who will assign participants to interventions                       |
| 40 |                |     | <b>Yes – page 7 and 8</b>                                               |
| 41 |                |     |                                                                         |
| 42 | Blinding       | 17a | Who will be blinded after assignment to interventions (eg, trial        |
| 43 | (masking)      |     | participants, care providers, outcome assessors, data analysts), and    |
| 44 |                |     | how                                                                     |
| 45 |                |     | <b>Yes – page 10</b>                                                    |
| 46 |                |     |                                                                         |
| 47 |                |     |                                                                         |
| 48 |                | 17b | If blinded, circumstances under which unblinding is permissible, and    |
| 49 |                |     | procedure for revealing a participant's allocated intervention during   |
| 50 |                |     | the trial                                                               |
| 51 |                |     | <b>Not applicable</b>                                                   |
| 52 |                |     |                                                                         |
| 53 |                |     |                                                                         |
| 54 |                |     |                                                                         |

### Methods: Data collection, management, and analysis

|    |                            |     |                                                                          |
|----|----------------------------|-----|--------------------------------------------------------------------------|
| 1  |                            |     |                                                                          |
| 2  | Data collection            | 18a | Plans for assessment and collection of outcome, baseline, and other      |
| 3  | methods                    |     | trial data, including any related processes to promote data quality (eg, |
| 4  |                            |     | duplicate measurements, training of assessors) and a description of      |
| 5  |                            |     | study instruments (eg, questionnaires, laboratory tests) along with      |
| 6  |                            |     | their reliability and validity, if known. Reference to where data        |
| 7  |                            |     | collection forms can be found, if not in the protocol                    |
| 8  |                            |     | <b>Yes – pages 10, 11 and 12</b>                                         |
| 9  |                            |     |                                                                          |
| 10 |                            |     |                                                                          |
| 11 |                            | 18b | Plans to promote participant retention and complete follow-up,           |
| 12 |                            |     | including list of any outcome data to be collected for participants who  |
| 13 |                            |     | discontinue or deviate from intervention protocols                       |
| 14 |                            |     | <b>Yes – page 10</b>                                                     |
| 15 |                            |     |                                                                          |
| 16 |                            |     |                                                                          |
| 17 | Data                       | 19  | Plans for data entry, coding, security, and storage, including any       |
| 18 | management                 |     | related processes to promote data quality (eg, double data entry;        |
| 19 |                            |     | range checks for data values). Reference to where details of data        |
| 20 |                            |     | management procedures can be found, if not in the protocol               |
| 21 |                            |     |                                                                          |
| 22 |                            |     |                                                                          |
| 23 | Statistical                | 20a | Statistical methods for analysing primary and secondary outcomes.        |
| 24 | methods                    |     | Reference to where other details of the statistical analysis plan can be |
| 25 |                            |     | found, if not in the protocol                                            |
| 26 |                            |     | <b>Yes – page 13</b>                                                     |
| 27 |                            |     |                                                                          |
| 28 |                            | 20b | Methods for any additional analyses (eg, subgroup and adjusted           |
| 29 |                            |     | analyses)                                                                |
| 30 |                            |     | <b>Yes – page 13</b>                                                     |
| 31 |                            |     |                                                                          |
| 32 |                            | 20c | Definition of analysis population relating to protocol non-adherence     |
| 33 |                            |     | (eg, as randomised analysis), and any statistical methods to handle      |
| 34 |                            |     | missing data (eg, multiple imputation)                                   |
| 35 |                            |     | <b>Yes – page 13</b>                                                     |
| 36 |                            |     |                                                                          |
| 37 |                            |     |                                                                          |
| 38 |                            |     |                                                                          |
| 39 | <b>Methods: Monitoring</b> |     |                                                                          |
| 40 |                            |     |                                                                          |
| 41 | Data monitoring            | 21a | Composition of data monitoring committee (DMC); summary of its role      |
| 42 |                            |     | and reporting structure; statement of whether it is independent from     |
| 43 |                            |     | the sponsor and competing interests; and reference to where further      |
| 44 |                            |     | details about its charter can be found, if not in the protocol.          |
| 45 |                            |     | Alternatively, an explanation of why a DMC is not needed                 |
| 46 |                            |     |                                                                          |
| 47 |                            | 21b | Description of any interim analyses and stopping guidelines, including   |
| 48 |                            |     | who will have access to these interim results and make the final         |
| 49 |                            |     | decision to terminate the trial                                          |
| 50 |                            |     | <b>Not performed</b>                                                     |
| 51 |                            |     |                                                                          |
| 52 |                            |     |                                                                          |
| 53 | Harms                      | 22  | Plans for collecting, assessing, reporting, and managing solicited and   |
| 54 |                            |     | spontaneously reported adverse events and other unintended effects       |
| 55 |                            |     | of trial interventions or trial conduct                                  |
| 56 |                            |     | <b>Not applicable</b>                                                    |
| 57 |                            |     |                                                                          |
| 58 |                            |     |                                                                          |
| 59 |                            |     |                                                                          |
| 60 |                            |     |                                                                          |

|    |                                 |     |                                                                                                                                                                                                                                                                                                                     |
|----|---------------------------------|-----|---------------------------------------------------------------------------------------------------------------------------------------------------------------------------------------------------------------------------------------------------------------------------------------------------------------------|
| 1  |                                 |     |                                                                                                                                                                                                                                                                                                                     |
| 2  | Auditing                        | 23  | Frequency and procedures for auditing trial conduct, if any, and whether the process will be independent from investigators and the sponsor                                                                                                                                                                         |
| 3  |                                 |     |                                                                                                                                                                                                                                                                                                                     |
| 4  |                                 |     |                                                                                                                                                                                                                                                                                                                     |
| 5  |                                 |     |                                                                                                                                                                                                                                                                                                                     |
| 6  |                                 |     |                                                                                                                                                                                                                                                                                                                     |
| 7  | <b>Ethics and dissemination</b> |     |                                                                                                                                                                                                                                                                                                                     |
| 8  |                                 |     |                                                                                                                                                                                                                                                                                                                     |
| 9  | Research ethics approval        | 24  | Plans for seeking research ethics committee/institutional review board (REC/IRB) approval<br><b>Yes – page 16</b>                                                                                                                                                                                                   |
| 10 |                                 |     |                                                                                                                                                                                                                                                                                                                     |
| 11 |                                 |     |                                                                                                                                                                                                                                                                                                                     |
| 12 |                                 |     |                                                                                                                                                                                                                                                                                                                     |
| 13 | Protocol amendments             | 25  | Plans for communicating important protocol modifications (eg, changes to eligibility criteria, outcomes, analyses) to relevant parties (eg, investigators, REC/IRBs, trial participants, trial registries, journals, regulators)<br><b>Yes – page 16</b>                                                            |
| 14 |                                 |     |                                                                                                                                                                                                                                                                                                                     |
| 15 |                                 |     |                                                                                                                                                                                                                                                                                                                     |
| 16 |                                 |     |                                                                                                                                                                                                                                                                                                                     |
| 17 |                                 |     |                                                                                                                                                                                                                                                                                                                     |
| 18 |                                 |     |                                                                                                                                                                                                                                                                                                                     |
| 19 |                                 |     |                                                                                                                                                                                                                                                                                                                     |
| 20 | Consent or assent               | 26a | Who will obtain informed consent or assent from potential trial participants or authorised surrogates, and how (see Item 32)                                                                                                                                                                                        |
| 21 |                                 |     |                                                                                                                                                                                                                                                                                                                     |
| 22 |                                 |     |                                                                                                                                                                                                                                                                                                                     |
| 23 |                                 | 26b | Additional consent provisions for collection and use of participant data and biological specimens in ancillary studies, if applicable<br><b>Not applicable</b>                                                                                                                                                      |
| 24 |                                 |     |                                                                                                                                                                                                                                                                                                                     |
| 25 |                                 |     |                                                                                                                                                                                                                                                                                                                     |
| 26 |                                 |     |                                                                                                                                                                                                                                                                                                                     |
| 27 | Confidentiality                 | 27  | How personal information about potential and enrolled participants will be collected, shared, and maintained in order to protect confidentiality before, during, and after the trial                                                                                                                                |
| 28 |                                 |     |                                                                                                                                                                                                                                                                                                                     |
| 29 |                                 |     |                                                                                                                                                                                                                                                                                                                     |
| 30 |                                 |     |                                                                                                                                                                                                                                                                                                                     |
| 31 |                                 |     |                                                                                                                                                                                                                                                                                                                     |
| 32 | Declaration of interests        | 28  | Financial and other competing interests for principal investigators for the overall trial and each study site<br><b>Yes – page 21</b>                                                                                                                                                                               |
| 33 |                                 |     |                                                                                                                                                                                                                                                                                                                     |
| 34 |                                 |     |                                                                                                                                                                                                                                                                                                                     |
| 35 |                                 |     |                                                                                                                                                                                                                                                                                                                     |
| 36 | Access to data                  | 29  | Statement of who will have access to the final trial dataset, and disclosure of contractual agreements that limit such access for investigators<br><b>Yes – page 17</b>                                                                                                                                             |
| 37 |                                 |     |                                                                                                                                                                                                                                                                                                                     |
| 38 |                                 |     |                                                                                                                                                                                                                                                                                                                     |
| 39 |                                 |     |                                                                                                                                                                                                                                                                                                                     |
| 40 |                                 |     |                                                                                                                                                                                                                                                                                                                     |
| 41 |                                 |     |                                                                                                                                                                                                                                                                                                                     |
| 42 | Ancillary and post-trial care   | 30  | Provisions, if any, for ancillary and post-trial care, and for compensation to those who suffer harm from trial participation                                                                                                                                                                                       |
| 43 |                                 |     |                                                                                                                                                                                                                                                                                                                     |
| 44 |                                 |     |                                                                                                                                                                                                                                                                                                                     |
| 45 | Dissemination policy            | 31a | Plans for investigators and sponsor to communicate trial results to participants, healthcare professionals, the public, and other relevant groups (eg, via publication, reporting in results databases, or other data sharing arrangements), including any publication restrictions<br><b>Yes – pages 16 and 17</b> |
| 46 |                                 |     |                                                                                                                                                                                                                                                                                                                     |
| 47 |                                 |     |                                                                                                                                                                                                                                                                                                                     |
| 48 |                                 |     |                                                                                                                                                                                                                                                                                                                     |
| 49 |                                 |     |                                                                                                                                                                                                                                                                                                                     |
| 50 |                                 |     |                                                                                                                                                                                                                                                                                                                     |
| 51 |                                 |     |                                                                                                                                                                                                                                                                                                                     |
| 52 |                                 | 31b | Authorship eligibility guidelines and any intended use of professional writers<br><b>Not applicable</b>                                                                                                                                                                                                             |
| 53 |                                 |     |                                                                                                                                                                                                                                                                                                                     |
| 54 |                                 |     |                                                                                                                                                                                                                                                                                                                     |
| 55 |                                 |     |                                                                                                                                                                                                                                                                                                                     |
| 56 |                                 |     |                                                                                                                                                                                                                                                                                                                     |
| 57 |                                 | 31c | Plans, if any, for granting public access to the full protocol, participant-level dataset, and statistical code<br><b>Yes – page 17</b>                                                                                                                                                                             |
| 58 |                                 |     |                                                                                                                                                                                                                                                                                                                     |
| 59 |                                 |     |                                                                                                                                                                                                                                                                                                                     |
| 60 |                                 |     |                                                                                                                                                                                                                                                                                                                     |

## Appendices

|                                 |                            |    |                                                                                                                                                                                                                         |
|---------------------------------|----------------------------|----|-------------------------------------------------------------------------------------------------------------------------------------------------------------------------------------------------------------------------|
| 1<br>2<br>3<br>4<br>5<br>6<br>7 | Informed consent materials | 32 | Model consent form and other related documentation given to participants and authorised surrogates<br><b>Not applicable</b>                                                                                             |
| 8<br>9<br>10<br>11<br>12<br>13  | Biological specimens       | 33 | Plans for collection, laboratory evaluation, and storage of biological specimens for genetic or molecular analysis in the current trial and for future use in ancillary studies, if applicable<br><b>Not applicable</b> |

---

\*It is strongly recommended that this checklist be read in conjunction with the SPIRIT 2013 Explanation & Elaboration for important clarification on the items. Amendments to the protocol should be tracked and dated. The SPIRIT checklist is copyrighted by the SPIRIT Group under the Creative Commons "[Attribution-NonCommercial-NoDerivs 3.0 Unported](https://creativecommons.org/licenses/by-nc-nd/3.0/)" license.
